# Supplementary material for: Which type of tobacco product warning imagery is more effective and sustainable over time? A longitudinal assessment of smokers in Canada, Australia and Mexico
Source: PubMed Central journal article supplement — BMJ Open. 2018 Jul 13;8(7):e021983. doi: 10.1136/bmjopen-2018-021983 (PMC6089327; doi:10.1136/bmjopen-2018-021983), 2018-07-13
Supplement: bmjopen-2018-021983.draft_revisions.pdf [file bmjopen-2018-021983.draft_revisions.pdf]

# BMJ Open

BMJ Open is committed to open peer review. As part of this commitment we make the peer review history of every article we publish publicly available.

When an article is published we post the peer reviewers' comments and the authors' responses online. We also post the versions of the paper that were used during peer review. These are the versions that the peer review comments apply to.

The versions of the paper that follow are the versions that were submitted during the peer review process. They are not the versions of record or the final published versions. They should not be cited or distributed as the published version of this manuscript.

BMJ Open is an open access journal and the full, final, typeset and author-corrected version of record of the manuscript is available on our site with no access controls, subscription charges or pay-per-view fees (<http://bmjopen.bmj.com>).

If you have any questions on BMJ Open's open peer review process please email [info.bmjopen@bmj.com](mailto:info.bmjopen@bmj.com)

# BMJ Open

## Which type of tobacco product warning imagery is more effective and sustainable over time? A longitudinal assessment of smokers in Canada, Australia, and Mexico

|                               |                                                                                                                                                                                                                                                                                                                                                                                                                                                                                                                                                         |
|-------------------------------|---------------------------------------------------------------------------------------------------------------------------------------------------------------------------------------------------------------------------------------------------------------------------------------------------------------------------------------------------------------------------------------------------------------------------------------------------------------------------------------------------------------------------------------------------------|
| Journal:                      | <i>BMJ Open</i>                                                                                                                                                                                                                                                                                                                                                                                                                                                                                                                                         |
| Manuscript ID                 | bmjopen-2018-021983                                                                                                                                                                                                                                                                                                                                                                                                                                                                                                                                     |
| Article Type:                 | Research                                                                                                                                                                                                                                                                                                                                                                                                                                                                                                                                                |
| Date Submitted by the Author: | 27-Feb-2018                                                                                                                                                                                                                                                                                                                                                                                                                                                                                                                                             |
| Complete List of Authors:     | Anshari, Dien; University of South Carolina, Health Promotion Education & Behavior; Universitas Indonesia, Department of Health Education and Behavioral Sciences<br>Yong, Hua; Cancer Council Victoria<br>Borland, Ron; Cancer Council Victoria<br>Hammond, David; University of Waterloo School of Public Health and Health Systems<br>Swayampakala, Kamala; University of South Carolina, Department of Health Promotion Education and Behavior<br>Thrasher, Jim; University of South Carolina, Department of Health Promotion, Education & Behavior |
| Keywords:                     | tobacco control, policy, communication, graphic warning                                                                                                                                                                                                                                                                                                                                                                                                                                                                                                 |
|                               |                                                                                                                                                                                                                                                                                                                                                                                                                                                                                                                                                         |

SCHOLARONE™  
Manuscripts

1  
2  
3 1 **Title:** Which type of tobacco product warning imagery is more effective and sustainable over  
4 2 time? A longitudinal assessment of smokers in Canada, Australia, and Mexico  
5 3

6 4 **Target Journal:** BMJ Open  
7 5

8 6 **Authors:**

9 7 Dien Anshari<sup>1,2</sup>

10 8 Hua-Hie Yong<sup>3</sup>

11 9 Ron Borland<sup>3</sup>

12 10 David Hammond<sup>4</sup>

13 11 Kamala Swayampakala<sup>1</sup>

14 12 James F Thrasher<sup>1</sup>  
15 13

16 14 <sup>1</sup> Department of Health Promotion, Education and Behavior, Arnold School of Public Health,  
17 15 University of South Carolina, Columbia, SC, USA

18 16 <sup>2</sup> Department of Health Education and Behavioral Sciences, Faculty of Public Health,  
19 17 Universitas Indonesia, Depok, Jawa Barat, Indonesia

20 18 <sup>3</sup> Nigel Gray Fellowship Group, Cancer Council Victoria, Melbourne, Victoria 3004, Australia

21 19 <sup>4</sup> School of Public Health and Health Systems, University of Waterloo, Waterloo, ON, Canada  
22 20

23 21 Corresponding author:

24 22 Dien Anshari

25 23 Department of Health Education and Behavioral Sciences

26 24 Faculty of Public Health

27 25 Universitas Indonesia

28 26 Tel: (+6221) 786-3475

29 27 Email: dienanshari@gmail.com  
30 28

31 29 Number of words: (3908 // 4000 max)  
32 30

33 31 Illustrations: 4 (5 max)

34 32 Supplementary data: 2 tables (no max)

35 33 References: 30 (no max)  
36 34  
37 35  
38  
39  
40  
41  
42  
43  
44  
45  
46  
47  
48  
49  
50  
51  
52  
53  
54  
55  
56  
57  
58  
59  
60

1  
2  
3 1 **Abstract** (words: 261 // 300 max)  
4 2

5 3 **Objective.** This study examined smokers' responses to pictorial health warnings (PHWs) with  
6 4 different types of imagery under natural exposure conditions.  
7 5

8 6 **Methods.** Adult smokers from online panels in Canada (n=2,357), Australia (n=1,671) and  
9 7 Mexico (n=2,537) were surveyed every four months from 2012 to 2013. Participants were shown  
10 8 PHWs on packs in their respective countries and asked about: 1) Noticing PHWs; 2) Negative  
11 9 affects toward PHWs; 3) Believability of PHWs; 4) PHW-stimulated discussions; and 5) Quit  
12 10 motivation due to PHWs. Country-specific generalized estimating equation models regressed  
13 11 these outcomes on time (i.e., survey wave), PHW imagery type (i.e., symbolic representations of  
14 12 risk; suffering from smoking; graphic depictions of bodily harm), and interactions between them.  
15 13

16 14 **Results.** In all countries, PHW responses did not significantly change over time, except for  
17 15 increased noticing PHWs in Canada and Mexico, increased negative affect in Australia, and  
18 16 decreased negative affect in Mexico. For all outcomes, symbolic PHWs were rated lower than  
19 17 suffering and graphic PHWs in Canada (the only country with symbolic PHWs). Graphic PHWs  
20 18 were rated higher than suffering PHWs for negative affect (all countries), discussions (Canada),  
21 19 and quit motivation (Australia). Suffering PHWs were rated higher than graphic PHWs for  
22 20 noticing PHWs (Canada), believability (all countries), discussions (Australia & Mexico), and  
23 21 quit motivation (Mexico). Changes in noticing, believability and discussions varied somewhat  
24 22 by imagery type across countries.  
25 23

26 24 **Conclusions.** The different PHW imagery appears to have different pathways of influence on  
27 25 adult smokers. Reactions to specific PHWs are similar over 1-2 years, suggesting that wear-out  
28 26 of PHW effects is due to decreased attention rather than the diminishing effectiveness of content.  
29 27

30 28 **Keywords:** policy; tobacco control; communication; graphic warning  
31 29  
32 30  
33  
34  
35  
36  
37  
38  
39  
40  
41  
42  
43  
44  
45  
46  
47  
48  
49  
50  
51  
52  
53  
54  
55  
56  
57  
58  
59  
60

### Strengths and limitations of this study

- Longitudinal assessment of smokers' responses under naturalistic, repeated exposure to PHWs can help to understand how different types of PHW imagery works over time.
- This study used measures of affective, cognitive and motivational responses of smokers exposed to PHWs with different types of imagery which may help understand the mechanisms for changes in responses over time.
- Other population-based studies have involved recalled impact of PHWs, while this study presented specific PHWs that were on packs at the time of the survey, which may help separate out potential habituation to the PHW message itself from the effects of attention toward PHWs.
- The differences in stimuli by country and within each category, and in some cases within country over time, limit the interpretations around cross-country comparisons.
- Data for this study came from an online consumer panel which may limit the ability to generalize the results to the broader population of smokers.

## 1 INTRODUCTION

2 The World Health Organization's Framework Convention on Tobacco Control  
3 recommends that countries implement multiple, prominent pictorial health warnings (PHWs) to  
4 communicate about tobacco-related diseases.<sup>1</sup> Over 70 countries have implemented PHWs using  
5 a great variety of messages and imagery.<sup>2</sup> Previous experimental studies have shown that  
6 compared to the text-only warnings, PHWs are more salient,<sup>3</sup> believable,<sup>4</sup> elicit stronger negative  
7 affect, and more likely to motivate cessation.<sup>5-7</sup> Although observational studies indicate that all  
8 forms of PHW regimens lose their effectiveness over time,<sup>8</sup> the mechanisms for wear-out are  
9 uncertain, as are the conditions under which wear-out might be reversed. In particular, it is not  
10 clear whether wear-out effects are because smokers become inured to PHW messages or are just  
11 less likely to attend to them. Further, of the wide variety of imagery used in PHWs, no studies of  
12 which we are aware have examined whether some types of imagery work best over time.

13 Based on the fear appeal theory, the effects of messages vary with the level of gruesome  
14 content or with the level of negative reaction elicited from the messages.<sup>9,10</sup> Thus, the imagery  
15 used in PHWs can be classified according to the level of gruesome content (i.e., from the most  
16 frightening to the least frightening), and negative affect such as disgust can explain audience  
17 reaction to PHWs.<sup>11</sup> Some experimental studies have examined responses to different types of  
18 pictorial imagery on PHWs,<sup>12-16</sup> generally classifying PHW imagery into three main categories:  
19 1) Graphic: Vivid depiction of negative health consequences or physical effects of smoking; 2)  
20 Suffering: Portrayal of personal experiences living with smoking-related diseases, including  
21 negative impacts on quality of life; and 3) Symbolic: Abstract or metaphorical representations of  
22 the negative effects of smoking. Previous experimental studies have consistently indicated that  
23 PHWs with graphic imagery elicit relatively stronger attentional, cognitive and behavioral

1 responses.<sup>12,13,17,18</sup> Furthermore, data from functional magnetic resonance imaging found that the  
2 levels of activation of different neural regions involved in image interpretation and emotion  
3 varied in a manner consistent with self-reported ratings of different PHWs imagery types.<sup>15</sup>  
4 Nevertheless, prior evidence on the superiority of certain types of images mainly came from pre-  
5 market experimental studies, and there is very little research on the validity of pre-market  
6 experiments for determining pictorial warning content that is most effective after policy  
7 implementation. Longitudinal studies of smokers' responses under naturalistic, repeated  
8 exposure to PHWs are needed to understand how different imagery works over time. Our study  
9 aimed to fill that gap by embedding specific warning rating methods used in experimental  
10 research into a longitudinal study design of consumer responses post-implementation of new  
11 warnings.

## 12 **Study Context**

13 Canada pioneered PHWs, implementing its first round in June 2001 with a set of 16  
14 PHWs that covered 50% of the front and back of cigarette packs. In 2012, a new set of 16 PHWs  
15 were implemented, covering 75% of the front and back of packs. In March 2006, Australia  
16 implemented its first PHWs, which covered 30% of the front and 90% of the back of cigarette  
17 packs. In December 2012, Australia introduced a new set of PHWs, rotating seven new PHWs  
18 each year, and pioneered standardized packaging that required all tobacco products be sold in  
19 dull, brown packages, with the same font and without company logos. Mexico first implemented  
20 PHWs in September 2010, requiring PHWs that covered 30% of the front and a text-only  
21 warning covering 100% of the back. Since 2012, four new PHWs were implemented every six  
22 months.

1 Using longitudinal data collected from adult smokers in Canada, Australia and Mexico,  
2 this study sought to examine: a) the affective, cognitive and motivational responses of smokers  
3 exposed to PHWs with different types of imagery (i.e., graphic, suffering, and symbolic); b)  
4 whether these responses changed over time; and c) whether the changes in responses over time  
5 depended on types of imagery. Other population-based studies have involved recalled impact of  
6 PHWs, in general; by contrast, this study presented specific PHWs that were on packs at the time  
7 of the survey, and queried smokers' ratings of these at the time of survey. This approach helps  
8 separate out potential habituation to the PHW message itself from the effects of attention toward  
9 PHWs.

## 10 **METHOD**

### 11 **Patient and Public Involvement**

12 This study did not involve patients nor the public as participants. Our study participants  
13 came from a consumer panel used for market research, all contact with participants was managed  
14 by a private company (GMI Lightspeed), and datasets we received did not include any  
15 information that would allow us to identify participants.

### 16 **Sample**

17 Data for this study came from an online consumer panel of adult smokers followed up  
18 every four months in Canada, Australia and Mexico who were 18 to 64 years old, had smoked  
19 100 or more cigarettes in their lifetime, and had smoked at least once in the previous month.  
20 Sample size in each country was approximately 1,000 at each wave, with replenishment  
21 sampling used to maintain sample size across waves and to reduce the attrition bias. For this  
22 study, the analytic sample included only current smokers at each wave (see Table 1) as ex-  
23 smokers were less likely to be exposed to PHWs. Additionally, to be comparable, only data from



1 post-implementation period in each country were included in the analysis (i.e., in Canada and  
2 Mexico: 4 survey waves from September 2012 to September 2013; in Australia: 3 survey waves  
3 from January 2013 to September 2013). Reporting of this study adhered to the STROBE  
4 guidelines (Appendix 1).

## 5 **Materials**

6 PHWs used as stimuli varied across countries depending on the actual PHWs  
7 implemented in each country. To reduce participant burden, participants were presented with  
8 only a subset of PHWs that appeared on cigarette packs in their respective country during the  
9 study period. Each participant was presented and asked to rate each of the PHWs in the subset.  
10 PHWs were selected to maximize the number with shared topical foci across countries. Of the 16  
11 PHWs on the market in Canada, we selected eight for our study (three suffering; three graphic;  
12 two symbolic). We also selected eight PHWs for Australia and Mexico; however, two of the  
13 PHWs for Australia were implemented after the study period, resulting in six PHWs analyzed for  
14 this study (i.e., two PHWs with suffering imagery and four PHWs with graphic imagery). Four  
15 new PHWs were introduced every six months in Mexico, where regulations do not require that  
16 packs with PHWs from prior rounds; Surveys in Mexico integrated some new PHWs while  
17 deleting others over time, resulting in 10 stimuli for this study (i.e., four PHWs with suffering  
18 imagery and six PHWs with graphic imagery; see Figure 1 for all stimuli used in this study by  
19 country and imagery type). PHW stimuli were presented in random order to account for ordering  
20 effects, and participants were asked a set of questions after viewing each of the stimuli.

## 21 **Measures**

22 *Main outcomes*

1  
2  
3 1 Participants were asked about five topical domains for each PHW assessing affective,  
4  
5 2 cognitive and motivational responses that have been shown to be important mediators for  
6  
7 3 warning label impact.<sup>7,19,20</sup> Noticing PHW was assessed using one item (i.e., “In the last month,  
8  
9 4 how often have you seen this warning on the cigarette packs that you buy?”), with responses  
10  
11 5 ranging from 1 (never) to 5 (very often). Due to a skewed distribution, responses were  
12  
13 6 dichotomized with 0 for those who answered never, and 1 for those who answered once to very  
14  
15 7 often. Negative affect was measured using three items (i.e., “How much does this warning make  
16  
17 8 you feel afraid?”; “How disgusting is this warning label?”; and “How much does this warning  
18  
19 9 make you feel worried about the health risks of smoking?”) to which participants indicated  
20  
21 10 agreement using a nine-point response scale with “not at all” and “extremely” at scale endpoints.  
22  
23 11 Responses of these items were averaged to form a scale (range of Cronbach’s alpha across  
24  
25 12 PHWs in Canada=0.86–0.91; Australia=0.86–0.93; Mexico=0.78–0.85). Message believability  
26  
27 13 was measured using a single item (i.e., “How believable is this warning?”), and so was quit  
28  
29 14 motivation (i.e., “How much does this warning make you want to quit smoking?”), with both  
30  
31 15 using a 9-point response scale, as above. Lastly, discussion about warning in the past month was  
32  
33 16 assessed (i.e., “In the last month, have you talked with anyone about this warning?”), with a  
34  
35 17 “yes” or “no” answer.  
36  
37  
38  
39  
40  
41

#### 42 *Independent variables*

43  
44 19 Each PHW was classified by type of imagery used (i.e., graphic, suffering, and, in  
45  
46 20 Canada only, symbolic), using dummy coding with suffering imagery as the reference group. We  
47  
48 21 created dummy variables for survey waves ranging from wave 1 to wave 4 for Canada and  
49  
50 22 Mexico (with wave 1 as the reference), and from wave 2 to wave 4 for Australia (with wave 2 as  
51  
52 23 the reference).  
53  
54  
55  
56  
57  
58  
59  
60

### 1 *Adjustment variables*

2 Adjustment variables included socio-demographic and smoking relevant variables. Socio-  
3 demographic variables included age group (18-24; 25-34; 35-44; 45-54; 55-64), gender,  
4 educational level (high school or less; some college or university; and completed university or  
5 higher), annual household income (Australia and Canada: \$29,999 or less, \$30,000-\$59,999, and  
6 \$60,000 or more; Mexico, monthly income, in pesos: \$5,000 or less, \$5,001-\$10,000, and  
7 \$10,001 or more), and race (for Canada only, white and non-white). Smoking-relevant variables  
8 included nicotine dependence, using the Heaviness of Smoking Index (HSI) that combined the  
9 number of cigarettes smoked per day and time to first cigarette of the day.<sup>21,22</sup> Intention to quit  
10 was measured by asking about plans to quit smoking (within the next month; within the next 6  
11 months; sometime in the future, beyond 6 months; not planning to quit; don't know), with  
12 responses dichotomized to reflect intentions to quit smoking within the next month or six months  
13 versus other responses. Recent quit attempts were measured by asking if participants have made  
14 a quit attempt in the prior 4 months. Additionally, to control for possible instrumentation effects  
15 due to prior survey participation, we also assessed and created dummy variables for the number  
16 of prior surveys completed by participants, using their first participation as the reference.

### 17 **Data analysis**

18 All analyses were conducted using Stata version 12, and were conducted separately by  
19 country due to the different PHWs assessed across countries. Each PHW was treated as a  
20 separate observation. To adjust for the correlated nature of the data and to maximize the number  
21 of cases available for analysis, generalized estimating equation (GEE) models with an  
22 exchangeable correlation matrix were used to compute parameter estimates. Separate bivariate  
23 and adjusted GEE models were estimated to assess the main effects of survey wave and PHW

1 imagery type on each of the outcomes. To assess linearity of trends over time, survey wave was  
2 treated as a continuous variable while controlling for adjustment variables; then a quadratic term  
3 (wave squared) was added to test for any nonlinearity in trends. For the final models, survey  
4 wave was treated as a categorical variable, and interaction terms between imagery type and  
5 survey wave were added into the models to test whether the patterns of change over time in  
6 outcomes of interest varied by PHW imagery type. Adjusted models included socio-demographics,  
7 smoking-related variables and time-in-sample. We also conducted some sensitivity analyses:  
8 First, for all models, we included variables to control media exposure that may coincided with  
9 PHW implementation that could also affect our study outcomes. The results were the same in  
10 terms of direction, magnitude and statistical significance. Second, we conducted sensitivity  
11 analyses with models regressing noticing PHWs as a continuous variable and as a dichotomous  
12 variable with different cut point, and regressing negative affect with the three original variables.  
13 Results were mostly consistent in terms of direction, magnitude, and statistical significance.

## 14 **RESULTS**

### 15 **Sample Characteristics**

16 Sample characteristics by country and survey wave are shown in Table 1. In baseline  
17 samples, over half of participants were women in Canada and Australia, while the reverse was  
18 true in Mexico. Most Mexican participants had some college or higher level of education, while  
19 about one third of Canadian and Australian participants had high school or less education.  
20 Compared to Canadian and Australian participants, Mexican participants were also younger, and  
21 had more non-daily smokers. The proportion of smokers who reported having attempted to quit  
22 was lower among Australian participants than those in Canada and Mexico.

### 23 **Changes of PHW Responses Over Time**

### 1 *Noticing PHWs*

2 We dichotomized responses to 0 for those who answered never versus 1 for those who  
3 answered otherwise. Most respondents saw the warnings in the last month (55%-64% in Canada,  
4 79%-82% in Australia, and 72%-81% in Mexico; see Appendix 2). In the adjusted model for  
5 Australia, no change in noticing PHWs over the study period was observed ( $p$ -value=0.528),  
6 with no statistically significant interaction to indicate a different pattern by imagery type. By  
7 contrast, noticing PHWs increased over the study period in both Canada and Mexico. In Canada,  
8 this increase was in a linear fashion ( $p$ -value=0.019) whereas in Mexico the trend was non-linear  
9 (quadratic trend  $p$ -value=0.004, Figure 2A). Main effects of imagery type on noticing PHWs also  
10 showed differences across countries. In Canada, symbolic images were less likely to be noticed  
11 than the suffering images and the graphic images (Table 2). Compared to the suffering images,  
12 graphic images were less likely to be noticed in Canada, but not in Australia or Mexico where no  
13 difference was observed (Table 2). A significant interaction between wave and imagery type was  
14 observed in Mexico suggesting the differences between PHWs with graphic and suffering images  
15 were significantly greater in the fourth waves ( $\chi^2=14.93$ ,  $p$ -value=0.027, Figure 2A).

### 16 *Negative affect*

17 Ratings of negative affect elicited by PHWs showed different patterns of results across  
18 the three countries (Table 2). For main effects of survey wave, negative affective responses did  
19 not change in Canada, increased in Australia ( $p$ -value=0.027), and declined in Mexico ( $p$ -  
20 value=0.044). No differences in these trends were found by imagery type. Graphic PHWs were  
21 rated higher than suffering PHWs on negative affect in Canada, Australia, and Mexico. Canadian  
22 symbolic PHWs were rated lower on negative affect than suffering and graphic PHWs (Table 2).

### 23 *Believability*

1 Adjusted models indicated no significant change in believability of PHWs over time in  
2 Canada ( $p$ -value=0.812), Australia ( $p$ -value=0.162), and Mexico ( $p$ -value=0.247). Compared to  
3 the suffering images, graphic images were rated lower on believability in Canada, Australia, and  
4 Mexico (Table 2). Also, in Canada, symbolic images were rated lower on believability than  
5 suffering and graphic images. A significant wave by imagery type interaction was observed in  
6 Canada ( $\chi^2=13.28$ ,  $p$ -value=0.039, Figure 2B), where believability ratings for graphic and  
7 symbolic PHWs seemed to increase while ratings of suffering PHWs declined in the fourth  
8 wave. In Australia, a significant wave by imagery type interaction was observed, with  
9 believability ratings increasing at a faster rate for graphic than for suffering PHWs ( $\chi^2=8.91$ ,  $p$ -  
10 value=0.012, Figure 2C).

### 11 *Quit motivation*

12 Main effects for survey waves indicated no changes in quit motivation ratings in Canada,  
13 Mexico, and Australia. For main effects of PHW imagery type, symbolic images in Canada were  
14 rated lower on quit motivation than suffering and graphic images. Graphic images were rated  
15 comparably to suffering images in Canada, but were rated higher in Australia, and lower in  
16 Mexico (Table 2). No statistically significant interaction between wave and imagery type was  
17 observed in any country.

### 18 *Discussion about PHWs*

19 Results for the main effects of survey wave showed no significant changes in discussions  
20 about PHWs in Canada ( $p$ -value=0.638), Australia ( $p$ -value=0.393), or Mexico ( $p$ -value=0.225).  
21 For the effects of imagery type, compared to suffering PHWs, graphic PHWs were more likely to  
22 be discussed in Canada, but less likely to be discussed in Australia and Mexico (Table 2).  
23 Canadian symbolic PHWs were less likely to be discussed than the graphic PHWs, but were no

1 different from the suffering PHWs (Table 2). Significant interactions between wave and imagery  
2 type were observed for Canada ( $\chi^2=14.9$ ,  $p$ -value=0.021) and Australia ( $\chi^2=10.13$ ,  $p$ -  
3 value=0.006). In Canada, discussion of graphic PHWs declined relative to suffering and  
4 symbolic PHWs (Figure 2D). By contrast, in Australia, over time, suffering PHWs were less  
5 likely to be discussed relative to graphic PHWs (Figure 2E).

## 6 **DISCUSSION**

7 This study found that a range of desirable responses to PHWs (i.e., noticing, negative  
8 affect, believability, quit motivation, and discussion about PHWs) were generally sustained over  
9 the 12- to 16-month study period, with no evidence of wear-out except for negative affect  
10 responses in Mexico. Our findings also indicate that smokers' responses to PHWs were  
11 influenced by the type of imagery used and, in some cases, by country. Compared to those with  
12 suffering imagery, PHWs with graphic imagery were only less noticeable in Canada, elicited  
13 greater negative affect and less believability in all countries, but differed in motivating smokers  
14 to quit and generating discussions in all countries.

15 Prior observational studies have found that smokers' responses to PHWs wear out over  
16 time;<sup>8,23,24</sup> however, this wear out may be due to reduced attention to the warnings. Our findings  
17 clearly show that when smokers are forced to view and evaluate PHWs, they do not lose their  
18 potency or basic recognition over the study period of more than 1 year, suggesting that it may be  
19 more meaningful to change the format and design of PHWs (e.g. background colors) in ways that  
20 re-elicite increased attention, rather than changing the propositional content or imagery. Indeed,  
21 this is consistent with Li et al who found no evidence of that two distinct sets of PHWs that  
22 rotate annually reduced wear-out in Australia, including in the year when the second set  
23 appeared for the first time.<sup>8</sup> However, the significant interaction between survey wave and

1  
2  
3 1 imagery type in Mexico showed different pattern with their PHWs became more believable in  
4  
5 2 wave 3 and 4 with suffering imagery being rated higher than graphic imagery. The current study  
6  
7 3 also provides some evidence that PHWs with suffering themed content are either equally or more  
8  
9 4 initially attention-grabbing than other PHW imagery. This is consistent with research in other  
10  
11 5 domains that show people's tendency to orient their attention toward facial stimuli over non-  
12  
13 6 facial stimuli.<sup>25,26</sup> Additionally, our findings may, in part, reflect how PHW imagery can include  
14  
15 7 both suffering and 'graphic' elements in addition to only facial portrayal of those who suffer  
16  
17 8 from smoking related health issues. This is generally consistent with previous findings that  
18  
19 9 PHWs featuring both graphic health effects and depictions of suffering are equally or more  
20  
21 10 effective than graphic images alone.<sup>15,27</sup>

22  
23  
24  
25  
26 11 For ratings of negative affect, we found mixed results across countries with no evidence  
27  
28 12 of wear-out in Canada, an increase of negative affect ratings in Australia, and a decrease of the  
29  
30 13 ratings in Mexico. It is unclear what the mechanisms responsible for the country differences  
31  
32 14 might be, but one possible reason for this might be due to the differences in image size across  
33  
34 15 countries. Our findings also provide support for past experimental studies that have found  
35  
36 16 graphic PHWs are superior to other types of PHW imagery in term of eliciting negative  
37  
38 17 affect,<sup>12,13,28</sup> which also support our classification of imagery type based on the level of  
39  
40 18 gruesome content and the extent to which they elicit negative reactions.<sup>9,10</sup> Across all countries,  
41  
42 19 graphic PHWs yielded higher ratings on negative affect than suffering PHWs, while symbolic  
43  
44 20 PHWs in Canada were rated as being the least emotionally evocative. This is consistent with  
45  
46 21 previous experiment that showed PHWs with symbolic imagery produce relatively lower neural  
47  
48 22 activation.<sup>15</sup>



1 We found no wear-out for the believability ratings of PHWs, which is generally  
2 consistent with previous research that showed the believability of health warnings is sustained  
3 over time.<sup>29,30</sup> Our findings also support prior experimental research<sup>13,14</sup> that has found symbolic  
4 PHWs are the least believable imagery type. However, we also found that suffering PHWs were  
5 rated as the most believable across three countries, which is inconsistent with previous research  
6 that showed graphic PHWs as the most believable.<sup>13</sup> Interestingly, the relatively greater  
7 believability of suffering imagery in Canada and Australia converged over time with other types  
8 of imagery, suggesting that smokers may need longer time to accept the messages in graphic or  
9 symbolic PHWs.

10 We found that the relative effects of PHW imagery type on quit motivation were different  
11 across the countries, with no differences between graphic and suffering PHWs in Canada,  
12 whereas graphic PHWs were superior to suffering PHWs in Australia, while the reverse was  
13 found in Mexico. These mixed findings across the countries may reflect country differences,  
14 including differences in the number of stimuli selected for the study, the textual and topical  
15 content of each image type and/or the characteristics of the studied sample. Future studies are  
16 needed to examine this issue in a systematic manner. Nevertheless, effects of different imagery  
17 types on quit motivation appears sustained over time in all three countries with some evidence  
18 that this effect gradually increased in Australia, the only country that has implemented plain  
19 packaging.

20 The ability of different PHW imagery types to stimulate discussion also appears different  
21 across countries. In Canada, graphic PHWs were superior to suffering and symbolic PHWs in  
22 stimulating discussion, but the effect was not sustained and declined to similar levels as for other  
23 imagery types over the study period. In Australia and Mexico, however, the pattern was in the

1  
2  
3 1 opposite direction, with suffering PHWs being superior to graphic PHWs for stimulating  
4  
5 2 discussion. This effect remained steady in Mexico, but not in Australia where the superiority of  
6  
7 3 suffering PHWs declined to the same levels as graphic PHWs over the study period. Again, it is  
8  
9 4 unclear what the mechanisms responsible for the country differences might be. One possible  
10  
11 5 reason for the divergent findings might be due to the combination of different features of the  
12  
13 6 warnings (e.g., image size, color formatting, etc.), the relative novelty and the number of years  
14  
15 7 since the change in image content across the countries.  
16  
17  
18

### 19 8 *Limitation*

20  
21 9 Our study has several limitations. Our main limitation is the differences in stimuli by  
22  
23 10 country and within each category, and in some cases within country over time. Hence,  
24  
25 11 interpretations around cross-country comparisons should be tempered by this regard. We aimed  
26  
27 12 to assess the actual PHWs implemented in each country, but we could not assess them all due to  
28  
29 13 the differences in the numbers and in the rotation of PHWs in each country. This resulted in an  
30  
31 14 unbalanced number of stimuli across the imagery type and the countries. More formal tests of  
32  
33 15 mediation may help determine whether the balance of imagery on warnings should be in favor of  
34  
35 16 one type or another. With only a few examples of each class of warnings, our findings could be  
36  
37 17 due to the quality of the textual content or other message features, not necessarily the way we  
38  
39 18 have categorized the images. Consistent effects of the messages would have provided a stronger  
40  
41 19 evidence for our categorization. Second, data for this study came from an online consumer panel  
42  
43 20 that were gathered from no known sampling frame, which limited the ability to generalize the  
44  
45 21 results to the broader population of smokers. However, the sample was designed to be  
46  
47 22 comparable to population of smokers in each country except Mexico, where smokers with higher  
48  
49 23 educational level are overrepresented due to differential Internet penetration. Lastly, with  
50  
51  
52  
53  
54  
55  
56  
57  
58  
59  
60

1 moderate retention rates (about 50%), our study results could be affected by non-response and  
2 attrition biases although all the estimates were adjusted for survey participation frequency,  
3 sociodemographic and smoking-related variables.

#### 4 *Conclusion*

5 Our study was the first to assess over-time reactions to specific types of PHW imagery  
6 under conditions of natural exposure. Using a recognition task paradigm, this study shows that  
7 when PHWs are attended to, they do not lose their potency over time suggesting that past  
8 findings of wear-outs may be due to less attention being paid to the PHWs over time. Future  
9 research can assess whether changing the design elements rather than just the propositional  
10 contents of PHWs may be a more effective way to maintain warning impact. Such research will  
11 be useful as over 100 countries have rotating pictorial warnings for which they have the  
12 opportunity to change warning content & design. Our study also shows that PHWs with suffering  
13 and graphic imagery appear to have different routes of impact and may work in complementary  
14 fashion in achieving the intended effects of PHWs.

1

**Acknowledgments.**

**Contributors.** DA contributed to devising methodological approach, analyzed the data and drafted the manuscript. H-HY and KS assisted with data analysis and interpretation of results. JFT conceptualized, designed the project, and obtained research funding. RB and DH contributed to the interpretation of findings. DA, H-HY, RB, DH, KS, JFT contributed to successive drafts, and approved the final manuscript.

**Funding.** This research is funded by a grant from the National Cancer Institute at the National Institutes of Health (R01-CA167067).

**Competing interests.** None declared.

**Ethics approval.** The Institutional Review Boards at the University of South Carolina and at the University of Waterloo.

**Provenance and peer review.** Not commissioned; externally peer reviewed.

**Data sharing statement.** All data are presented. For further information, please contact the corresponding author, DA.

## References

1. World Health Organization. *WHO Framework Convention on Tobacco Control*. WHO; 2005.
2. Canadian Cancer Society. *Cigarette Package Health Warnings: International Status Report (5th Ed.)*; 2016.
3. Peters E, Romer D, Slovic P, et al. The impact and acceptability of Canadian-style cigarette warning labels among U.S. smokers and nonsmokers. *Nicotine Tob Res*. 2007;9(4):473-81. doi:10.1080/14622200701239639.
4. Cantrell J, Vallone DM, Thrasher JF, et al. Impact of tobacco-related health warning labels across socioeconomic, race and ethnic groups: results from a randomized web-based experiment. *PLoS One*. 2013;8(1):e52206. doi:10.1371/journal.pone.0052206.
5. Andrews JC, Netemeyer RG, Burton S, Kees J. Effects of plain package branding and graphic health warnings on adolescent smokers in the USA, Spain and France. *Tob Control*. 2016:tobaccocontrol-2015-052583. doi:10.1136/tobaccocontrol-2015-052583.
6. Kees J, Burton S, Andrews JC, Kozup J. Understanding how graphic pictorial warnings work on cigarette packaging. *J Public Policy Mark*. 2010;29(2):265-276. doi:10.1016/j.tree.2009.02.010.
7. Noar SM, Hall MG, Francis DB, Ribisl KM, Pepper JK, Brewer NT. Pictorial cigarette pack warnings: a meta-analysis of experimental studies. *Tob Control*. 2016:341-354. doi:10.1136/tobaccocontrol-2014-051978.
8. Li L, Borland R, Yong H, et al. Longer term impact of cigarette package warnings in Australia compared with the United Kingdom and Canada. *Health Educ Res*. 2015;30(1):67-80. doi:10.1093/her/cyu074.
9. Witte K. Putting the fear back into fear appeals: The extended parallel process model. *Commun Monogr*. 1992;59(4):329-349. doi:10.1080/03637759209376276.
10. O'Keefe DJ. *Persuasion: Theory and Research*. Newberry Park, CA: Sage; 1990.
11. Humphris G, Williams B. Is disgust the driver behind the selection of images for UK tobacco packets? *Health Educ J*. 2014;73(5):522-529. doi:10.1177/0017896913496399.
12. Hammond D, Thrasher JF, Reid JL, Driezen P, Boudreau C, Santillán EA. Perceived effectiveness of pictorial health warnings among Mexican youth and adults: a population-level intervention with potential to reduce tobacco-related inequities. *Cancer Causes Control*. 2012;23:57-67. doi:10.1007/s10552-012-9902-4.
13. Thrasher JF, Carpenter MJ, Andrews JO, et al. Cigarette warning label policy alternatives and smoking-related health disparities. *Am J Prev Med*. 2012;43(6):590-600. doi:10.1016/j.amepre.2012.08.025.
14. Huang L-L, Thrasher JF, Reid JL, Hammond D. Predictive and External Validity of a Pre-Market Study to Determine the Most Effective Pictorial Health Warning Label Content for Cigarette Packages. *Nicotine Tob Res*. 2016;18(5):1376-81. doi:10.1093/ntr/ntv184.
15. Newman-Norlund RD, Thrasher JF, Fridriksson J, et al. Neural biomarkers for assessing different types of imagery in pictorial health warning labels for cigarette packaging: a cross-sectional study. *BMJ Open*. 2014;4(12):e006411. doi:10.1136/bmjopen-2014-006411.
16. Cameron LD, Pepper JK, Brewer NT. Responses of young adults to graphic warning labels for cigarette packages. *Tob Control*. 2013. doi:10.1136/tobaccocontrol-2012-050645.
17. Fong GT, Hammond D, Jiang Y, et al. Perceptions of tobacco health warnings in China

- 1  
2  
3 1 compared with picture and text-only health warnings from other countries: an  
4 2 experimental study. *Tob Control*. 2010;19(Suppl 2):i69-i77. doi:10.1136/tc.2010.036483.  
5 3 18. Malouff JM, Schutte NS, Rooke SE, MacDonell G. Effects on smokers of exposure to  
6 4 graphic warning images. *Am J Addict*. 2012;21(6):555-7. doi:10.1111/j.1521-  
7 5 0391.2012.00284.x.  
8 6 19. Emery LF, Romer D, Sheerin KM, Jamieson KH, Peters E. Affective and cognitive  
9 7 mediators of the impact of cigarette warning labels. *Nicotine Tob Res*. 2014;16(3):263-9.  
10 8 doi:10.1093/ntr/ntt124.  
11 9 20. Yong H-H, Borland R, Thrasher JF, et al. Mediation pathways of the impact of cigarette  
12 10 warning labels on quit attempts. *Heal Psychol*. 2014;33(11):1410-1420.  
13 11 doi:http://dx.doi.org/10.1037/hea0000056.  
14 12 21. Borland R, Yong H-H, O'Connor RJ, Hyland A, Thompson ME. The reliability and  
15 13 predictive validity of the Heaviness of Smoking Index and its two components: findings  
16 14 from the International Tobacco Control Four Country study. *Nicotine Tob Res*. 2010;12  
17 15 Suppl:S45-50. doi:10.1093/ntr/ntq038.  
18 16 22. Heatherton TF, Kozlowski LT, Frecker RC, Rickert W, Robinson J. Measuring the  
19 17 Heaviness of Smoking: using self-reported time to the first cigarette of the day and  
20 18 number of cigarettes smoked per day. *Addiction*. 1989;84(7):791-800. doi:10.1111/j.1360-  
21 19 0443.1989.tb03059.x.  
22 20 23. Borland R, Wilson N, Fong GT, et al. Impact of graphic and text warnings on cigarette  
23 21 packs: findings from four countries over five years. *Tob Control*. 2009;18(5):358-64.  
24 22 doi:10.1136/tc.2008.028043.  
25 23 24. Hitchman SC, Driezen P, Logel C, Hammond D, Fong GT. Changes in effectiveness of  
26 24 cigarette health warnings over time in Canada and the United States, 2002-2011. *Nicotine  
27 25 Tob Res*. 2014;16(5):536-43. doi:10.1093/ntr/ntt196.  
28 26 25. Bindemann M, Burton AM, Hooge ITC, Jenkins R, de Haan EHF. Faces retain attention.  
29 27 *Psychon Bull Rev*. 2005;12(6):1048-53.  
30 28 26. Langton SRH, Law AS, Burton AM, Schweinberger SR. Attention capture by faces.  
31 29 *Cognition*. 2008;107(1):330-342. doi:10.1016/j.cognition.2007.07.012.  
32 30 27. Hammond D. Health warning messages on tobacco products: a review. *Tob Control*.  
33 31 2011;20(5):327-37. doi:10.1136/tc.2010.037630.  
34 32 28. Thrasher JF, Arillo-Santillán E, Villalobos V, et al. Can pictorial warning labels on  
35 33 cigarette packages address smoking-related health disparities? Field experiments in  
36 34 Mexico to assess pictorial warning label content. *Cancer Causes Control*. 2012;23 Suppl  
37 35 1:69-80. doi:10.1007/s10552-012-9899-8.  
38 36 29. Environics. *The health effects of tobacco and health warning messages on cigarette  
39 37 packages: Survey of adults and adult smokers*. Toronto; 2002.  
40 38 30. Shanahan P, Elliott D. *Evaluation of the Effectiveness of the Graphic Health Warnings on  
41 39 Tobacco Product Packaging 2008 – Full Report*. Canberra; 2008.  
42 40  
43 41  
44 42  
45  
46  
47  
48  
49  
50  
51  
52  
53  
54  
55  
56  
57  
58  
59  
60

1  
2  
3  
4  
5  
6  
7  
8  
9  
10  
11  
12  
13  
14  
15  
16  
17  
18  
19  
20  
21  
22  
23  
24  
25  
26  
27  
28  
29  
30  
31  
32  
33  
34  
35  
36  
37  
38  
39  
40  
41  
42  
43  
44  
45  
46  
47  
48  
49  
50  
51  
52  
53  
54  
55  
56  
57  
58  
59  
60

- 1 **Figure 1. Study stimuli for each country, by imagery type.**
- 2 **Figure 2. Trends of noticing, believability, and discussion of PHWs.**

For peer review only

**Table 1. Characteristics of current smokers at each survey wave by country (in %)**

|                                         | CANADA |      |      |       | AUSTRALIA |      |      | MEXICO |      |      |      |
|-----------------------------------------|--------|------|------|-------|-----------|------|------|--------|------|------|------|
|                                         | W1     | W2   | W3   | W4    | W2        | W3   | W4   | W1     | W2   | W3   | W4   |
| <b>N =</b>                              | 1,000  | 969  | 964  | 967   | 970       | 963  | 968  | 1,000  | 956  | 956  | 948  |
| <b>Age</b>                              |        |      |      |       |           |      |      |        |      |      |      |
| 18-24                                   | 13.7   | 12.8 | 11.3 | 12.1  | 7.7       | 7.9  | 7.8  | 20.0   | 20.1 | 20.2 | 20.6 |
| 25-34                                   | 22.2   | 22.0 | 22.9 | 22.7  | 22.1      | 23.3 | 24.7 | 30.0   | 29.9 | 30.0 | 32.2 |
| 35-44                                   | 22.2   | 21.6 | 21.9 | 20.5  | 22.5      | 23.5 | 23.5 | 20.0   | 20.0 | 19.8 | 19.1 |
| 45-54                                   | 20.3   | 20.9 | 21.4 | 22.5  | 24.1      | 22.4 | 22.6 | 15.0   | 14.8 | 15.1 | 15.0 |
| 55-64                                   | 21.6   | 22.7 | 22.5 | 22.2  | 23.6      | 22.9 | 21.4 | 15.0   | 15.2 | 14.9 | 13.1 |
| <b>Sex</b>                              |        |      |      |       |           |      |      |        |      |      |      |
| Male                                    | 40.5   | 43.0 | 44.4 | 46.3  | 41.3      | 43.6 | 47.8 | 54.8   | 54.7 | 52.8 | 55.9 |
| Female                                  | 59.5   | 57.0 | 55.6 | 53.7  | 58.7      | 56.4 | 52.2 | 45.2   | 45.3 | 47.2 | 44.1 |
| <b>Education</b>                        |        |      |      |       |           |      |      |        |      |      |      |
| High school or less                     | 30.1   | 33.7 | 37.4 | 31.3  | 38.7      | 37.0 | 29.9 | 6.1    | 6.6  | 6.5  | 3.3  |
| College or some university              | 43.8   | 46.5 | 47.1 | 42.9  | 42.1      | 43.2 | 41.9 | 47.7   | 55.7 | 61.3 | 44.6 |
| Completed university or higher          | 26.1   | 19.8 | 15.5 | 25.8  | 19.3      | 19.8 | 28.2 | 46.2   | 37.7 | 32.2 | 52.1 |
| <b>Income</b>                           |        |      |      |       |           |      |      |        |      |      |      |
| Low                                     | 28.4   | 27.7 | 28.8 | 24.9  | 24.4      | 23.6 | 22.7 | 46.3   | 43.0 | 42.7 | 38.9 |
| Middle                                  | 32.6   | 32.1 | 31.5 | 31.3  | 25.5      | 28.4 | 27.4 | 29.5   | 35.0 | 34.1 | 32.8 |
| High                                    | 39.0   | 40.2 | 39.7 | 43.8  | 50.2      | 48.0 | 49.9 | 24.2   | 22.0 | 23.2 | 28.3 |
| <b>Smoking Intensity</b>                |        |      |      |       |           |      |      |        |      |      |      |
| non-daily                               | 22.0   | 15.9 | 16.5 | 18.3  | 12.3      | 12.8 | 13.2 | 51.2   | 52.8 | 49.3 | 50.5 |
| daily, 10 cpd or less                   | 23.7   | 28.8 | 25.1 | 27.8  | 23.1      | 24.3 | 25.4 | 33.7   | 30.3 | 34.3 | 33.1 |
| daily, more than 10 cpd                 | 54.3   | 55.3 | 58.4 | 53.9  | 64.6      | 62.9 | 61.4 | 15.1   | 16.8 | 16.4 | 16.4 |
| <b>Quit intentions in next 6-months</b> |        |      |      |       |           |      |      |        |      |      |      |
| Yes                                     | 47.3   | 43.5 | 41.8 | 43.02 | 40.1      | 39.7 | 41.5 | 40.6   | 47.5 | 46.6 | 46.6 |
| No                                      | 52.7   | 56.5 | 58.2 | 56.98 | 59.9      | 60.3 | 58.5 | 59.4   | 52.5 | 53.4 | 53.4 |
| <b>Quit attempts in past 4-months</b>   |        |      |      |       |           |      |      |        |      |      |      |
| Yes                                     | 41.7   | 40.0 | 37.2 | 38.2  | 34.0      | 34.0 | 35.5 | 48.0   | 53.2 | 55.0 | 52.7 |
| No                                      | 58.3   | 60.0 | 62.8 | 61.8  | 66.0      | 66.0 | 64.5 | 52.0   | 46.8 | 45.0 | 47.3 |

Note: Country differences in sample characteristics at baseline wave were all significant ( $p < 0.01$  for quit intention and  $p < 0.001$  for others); cpd, cigarette per day.



**Table 2. Final GEE model showing main effects of wave and image type, along with any significant interaction between wave and image type**

| Outcomes,<br>Independent Variables                   | CANADA       |                |        | AUSTRALIA    |                |        | MEXICO       |                |        |
|------------------------------------------------------|--------------|----------------|--------|--------------|----------------|--------|--------------|----------------|--------|
|                                                      | est          | 95% CI         | P>z    | est          | 95% CI         | P>z    | est          | 95% CI         | P>z    |
| <b>Noticing PHW, OR (95% CI)</b>                     |              |                |        |              |                |        |              |                |        |
| Survey Wave                                          |              |                | 0.019  |              |                | 0.528  |              |                | <0.001 |
| wave 1                                               | ref          |                |        | ref          |                |        | ref          |                |        |
| wave 2                                               | 1.08         | (0.95, 1.23)   | 0.229  | n/a          |                |        | 1.05         | (0.88, 1.25)   | 0.620  |
| wave 3                                               | <b>1.26</b>  | (1.09, 1.47)   | 0.002  | 1.12         | (0.92, 1.37)   | 0.258  | 1.20         | (1.00, 1.44)   | 0.056  |
| wave 4                                               | 1.18         | (1.00, 1.40)   | 0.055  | 1.08         | (0.85, 1.38)   | 0.521  | <b>1.81</b>  | (1.48, 2.20)   | <0.001 |
| Image Type                                           |              |                | <0.001 |              |                | 0.545  |              |                | 0.363  |
| Suffering                                            | ref          |                |        | ref          |                |        | ref          |                |        |
| Symbolic                                             | <b>0.65</b>  | (0.61, 0.69)   | <0.001 | n/a          |                |        | n/a          |                |        |
| Graphic                                              | <b>0.70</b>  | (0.66, 0.74)   | <0.001 | 0.98         | (0.91, 1.05)   | 0.545  | 0.95         | (0.86, 1.06)   | 0.363  |
| Wave x Image interaction                             |              |                |        |              |                |        |              |                | 0.027  |
| wave 2 x symbolic                                    | n/a          |                |        | n/a          |                |        | n/a          |                |        |
| wave 2 x graphic                                     | n/a          |                |        | n/a          |                |        | 0.92         | (0.80, 1.05)   | 0.219  |
| wave 3 x symbolic                                    | n/a          |                |        | n/a          |                |        | n/a          |                |        |
| wave 3 x graphic                                     | n/a          |                |        | n/a          |                |        | 1.04         | (0.90, 1.20)   | 0.624  |
| wave 4 x symbolic                                    | n/a          |                |        | n/a          |                |        | n/a          |                |        |
| wave 4 x graphic                                     | n/a          |                |        | n/a          |                |        | <b>0.86</b>  | (0.74, 0.99)   | 0.034  |
| <b>Negative Affects, <math>\beta</math> (95% CI)</b> |              |                |        |              |                |        |              |                |        |
| Survey Wave                                          |              |                | 0.629  |              |                | 0.027  |              |                | 0.044  |
| wave 1                                               | ref          |                |        | n/a          |                |        | ref          |                |        |
| wave 2                                               | 0.06         | (-0.08, 0.20)  | 0.384  | ref          |                |        | 0.00         | (-0.14, 0.15)  | 0.950  |
| wave 3                                               | 0.08         | (-0.11, 0.28)  | 0.402  | <b>0.22</b>  | (0.03, 0.40)   | 0.021  | -0.06        | (-0.24, 0.13)  | 0.550  |
| wave 4                                               | 0.03         | (-0.23, 0.28)  | 0.837  | <b>0.36</b>  | (0.09, 0.63)   | 0.009  | <b>-0.25</b> | (-0.47, -0.02) | 0.031  |
| Image Type                                           |              |                | <0.001 |              |                | <0.001 |              |                | <0.001 |
| Suffering                                            | ref          |                |        | ref          |                |        | ref          |                |        |
| Symbolic                                             | <b>-0.85</b> | (-0.90, -0.80) | <0.001 | n/a          |                |        | n/a          |                |        |
| Graphic                                              | <b>0.49</b>  | (0.45, 0.52)   | <0.001 | <b>0.22</b>  | (0.17, 0.27)   | <0.001 | <b>0.33</b>  | (0.29, 0.35)   | <0.001 |
| <b>Believability, <math>\beta</math> (95% CI)</b>    |              |                |        |              |                |        |              |                |        |
| Survey Wave                                          |              |                | 0.812  |              |                | 0.162  |              |                | 0.247  |
| wave 1                                               | ref          |                |        | n/a          |                |        | ref          |                |        |
| wave 2                                               | 0.01         | (-0.14, 0.17)  | 0.868  | ref          |                |        | -0.10        | (-0.24, 0.04)  | 0.177  |
| wave 3                                               | 0.04         | (-0.18, 0.26)  | 0.722  | 0.15         | (-0.06, 0.36)  | 0.155  | -0.09        | (-0.25, 0.08)  | 0.301  |
| wave 4                                               | -0.04        | (-0.31, 0.24)  | 0.787  | 0.29         | (-0.01, 0.56)  | 0.057  | -0.18        | (-0.38, 0.01)  | 0.064  |
| Image Type                                           |              |                | <0.001 |              |                | <0.001 |              |                | <0.001 |
| Suffering                                            | ref          |                |        | ref          |                |        | ref          |                |        |
| Symbolic                                             | <b>-0.65</b> | (-0.74, -0.56) | <0.001 | n/a          |                |        | n/a          |                |        |
| Graphic                                              | <b>-0.43</b> | (-0.51, -0.35) | <0.001 | <b>-0.22</b> | (-0.30, -0.14) | <0.001 | <b>-0.24</b> | (-0.28, -0.21) | <0.001 |

| Outcomes,<br>Independent Variables                  | CANADA       |                |        | AUSTRALIA   |               |        | MEXICO       |                |        |
|-----------------------------------------------------|--------------|----------------|--------|-------------|---------------|--------|--------------|----------------|--------|
|                                                     | est          | 95% CI         | P>z    | est         | 95% CI        | P>z    | est          | 95% CI         | P>z    |
| Wave x Image interaction                            |              |                | 0.039  |             |               | 0.012  |              |                |        |
| wave 2 x symbolic                                   | 0.00         | (-0.12, 0.12)  | 0.998  | n/a         |               |        | n/a          |                |        |
| wave 2 x graphic                                    | 0.02         | (-0.08, 0.13)  | 0.677  | n/a         |               |        | n/a          |                |        |
| wave 3 x symbolic                                   | 0.07         | (-0.05, 0.19)  | 0.254  | n/a         |               |        | n/a          |                |        |
| wave 3 x graphic                                    | 0.03         | (-0.08, 0.13)  | 0.645  | 0.09        | (-0.01, 0.19) | 0.092  | n/a          |                |        |
| wave 4 x symbolic                                   | <b>0.15</b>  | (0.03, 0.27)   | 0.012  | n/a         |               |        | n/a          |                |        |
| wave 4 x graphic                                    | <b>0.14</b>  | (0.03, 0.24)   | 0.009  | <b>0.16</b> | (0.05, 0.26)  | 0.003  | n/a          |                |        |
| <b>Quit Motivation, <math>\beta</math> (95% CI)</b> |              |                |        |             |               |        |              |                |        |
| Survey Wave                                         |              |                | 0.646  |             |               | 0.062  |              |                | 0.263  |
| wave 1                                              | ref          |                |        | n/a         |               |        | ref          |                |        |
| wave 2                                              | 0.04         | (-0.12, 0.20)  | 0.630  | ref         |               |        | 0.04         | (-0.12, 0.20)  | 0.624  |
| wave 3                                              | 0.12         | (-0.09, 0.34)  | 0.264  | 0.21        | (0.00, 0.43)  | 0.052  | -0.03        | (-0.24, 0.18)  | 0.769  |
| wave 4                                              | 0.08         | (-0.19, 0.34)  | 0.577  | <b>0.34</b> | (0.05, 0.63)  | 0.021  | -0.17        | (-0.42, 0.09)  | 0.195  |
| Image Type                                          |              |                | <0.001 |             |               | <0.001 |              |                | <0.001 |
| Suffering                                           | ref          |                |        | ref         |               |        | ref          |                |        |
| Symbolic                                            | <b>-0.96</b> | (-1.01, -0.90) | <0.001 | n/a         |               |        | n/a          |                |        |
| Graphic                                             | -0.01        | (-0.05, 0.03)  | 0.478  | <b>0.18</b> | (0.12, 0.23)  | <0.001 | <b>-0.07</b> | (-0.10, -0.03) | <0.001 |
| <b>Discussion about PHWs, OR (95% CI)</b>           |              |                |        |             |               |        |              |                |        |
| Survey Wave                                         |              |                | 0.638  |             |               | 0.393  |              |                | 0.225  |
| wave 1                                              | ref          |                |        | ref         |               |        | ref          |                |        |
| wave 2                                              | 0.85         | (0.65, 1.11)   | 0.224  | n/a         |               |        | 1.12         | (0.95, 1.32)   | 0.172  |
| wave 3                                              | 0.89         | (0.68, 1.18)   | 0.430  | 0.92        | (0.75, 1.13)  | 0.441  | 0.97         | (0.82, 1.17)   | 0.731  |
| wave 4                                              | 0.96         | (0.73, 1.27)   | 0.792  | 0.84        | (0.65, 1.08)  | 0.172  | 1.06         | (0.89, 1.27)   | 0.518  |
| Image Type                                          |              |                | <0.001 |             |               | <0.001 |              |                | 0.004  |
| Suffering                                           | ref          |                |        | ref         |               |        | ref          |                |        |
| Symbolic                                            | 0.83         | (0.67, 1.01)   | 0.063  | n/a         |               |        | n/a          |                |        |
| Graphic                                             | <b>1.41</b>  | (1.20, 1.65)   | <0.001 | <b>0.53</b> | (0.46, 0.61)  | <0.001 | <b>0.94</b>  | (0.90, 0.98)   | 0.004  |
| Wave x Image interaction                            |              |                | 0.021  |             |               | 0.006  |              |                |        |
| wave 2 x symbolic                                   | 0.98         | (0.75, 1.29)   | 0.888  | n/a         |               |        | n/a          |                |        |
| wave 2 x graphic                                    | 0.98         | (0.79, 1.22)   | 0.847  | n/a         |               |        | n/a          |                |        |
| wave 3 x symbolic                                   | 0.97         | (0.72, 1.30)   | 0.842  | n/a         |               |        | n/a          |                |        |
| wave 3 x graphic                                    | 0.87         | (0.69, 1.09)   | 0.232  | 1.05        | (0.87, 1.26)  | 0.634  | n/a          |                |        |
| wave 4 x symbolic                                   | 1.04         | (0.78, 1.38)   | 0.795  | n/a         |               |        | n/a          |                |        |
| wave 4 x graphic                                    | <b>0.70</b>  | (0.57, 0.88)   | 0.002  | <b>1.33</b> | (1.10, 1.61)  | 0.004  | n/a          |                |        |

Note: est, estimate;  $\beta$ , regression coefficient; OR, odds ratio; CI, confidence interval; n/a, not applicable;

Interaction and stratification models were adjusted. Adjustment variables include: age, sex, educational level, income level, quit intention in the next 6 months, quit attempt, Heaviness of Smoking Index, daily smoking status, time in sample, and race (Canada only).

| Country     | PHW Imagery Type                                                                   |                                                                                   |                                                                                     |
|-------------|------------------------------------------------------------------------------------|-----------------------------------------------------------------------------------|-------------------------------------------------------------------------------------|
|             | Suffering                                                                          | Symbolic                                                                          | Graphic                                                                             |
| Canada      |   |  |   |
| Australia * |   | Not included                                                                      |   |
| Mexico      |  | Not included                                                                      |  |

Notes:

\* Included only PHWs from the first set of 7 new health warnings on standardized packaging implemented in December 2012 in Australia.

All images are in the public domain, as they are images that are printed on cigarette packs that you can purchase in each country. For that reason, they can be used for research purposes, and they can be published in scientific manuscripts without permission.

Figure 1. Study stimuli for each country, by imagery type.

215x279mm (300 x 300 DPI)

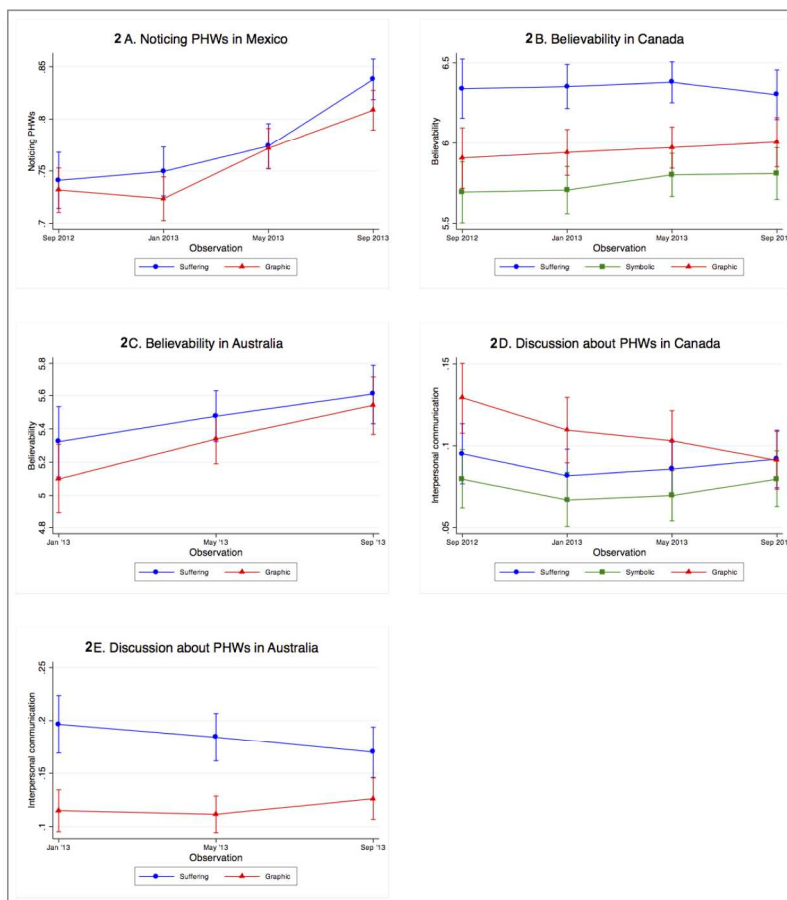

Figure 2. Trends of noticing, believability, and discussion of PHWs.

209x296mm (300 x 300 DPI)

**STROBE 2007 (v4) checklist of items to be included in reports of observational studies in epidemiology\***  
**Checklist for cohort, case-control, and cross-sectional studies (combined)**

| Section/Topic             | Item # | Recommendation                                                                                                                                                                                                                                                                                                                                                                                                                                                         | Reported on page # |
|---------------------------|--------|------------------------------------------------------------------------------------------------------------------------------------------------------------------------------------------------------------------------------------------------------------------------------------------------------------------------------------------------------------------------------------------------------------------------------------------------------------------------|--------------------|
| Title and abstract        | 1      | (a) Indicate the study's design with a commonly used term in the title or the abstract                                                                                                                                                                                                                                                                                                                                                                                 | 1, 2               |
|                           |        | (b) Provide in the abstract an informative and balanced summary of what was done and what was found                                                                                                                                                                                                                                                                                                                                                                    | 2                  |
| <b>Introduction</b>       |        |                                                                                                                                                                                                                                                                                                                                                                                                                                                                        |                    |
| Background/rationale      | 2      | Explain the scientific background and rationale for the investigation being reported                                                                                                                                                                                                                                                                                                                                                                                   | 4, 5               |
| Objectives                | 3      | State specific objectives, including any pre-specified hypotheses                                                                                                                                                                                                                                                                                                                                                                                                      | 6                  |
| <b>Methods</b>            |        |                                                                                                                                                                                                                                                                                                                                                                                                                                                                        |                    |
| Study design              | 4      | Present key elements of study design early in the paper                                                                                                                                                                                                                                                                                                                                                                                                                | 6, 7               |
| Setting                   | 5      | Describe the setting, locations, and relevant dates, including periods of recruitment, exposure, follow-up, and data collection                                                                                                                                                                                                                                                                                                                                        | 6                  |
| Participants              | 6      | (a) <i>Cohort study</i> —Give the eligibility criteria, and the sources and methods of selection of participants. Describe methods of follow-up<br><i>Case-control study</i> —Give the eligibility criteria, and the sources and methods of case ascertainment and control selection. Give the rationale for the choice of cases and controls<br><i>Cross-sectional study</i> —Give the eligibility criteria, and the sources and methods of selection of participants | 6                  |
|                           |        | (b) <i>Cohort study</i> —For matched studies, give matching criteria and number of exposed and unexposed<br><i>Case-control study</i> —For matched studies, give matching criteria and the number of controls per case                                                                                                                                                                                                                                                 | 6                  |
| Variables                 | 7      | Clearly define all outcomes, exposures, predictors, potential confounders, and effect modifiers. Give diagnostic criteria, if applicable                                                                                                                                                                                                                                                                                                                               | 7-9                |
| Data sources/ measurement | 8*     | For each variable of interest, give sources of data and details of methods of assessment (measurement). Describe comparability of assessment methods if there is more than one group                                                                                                                                                                                                                                                                                   | 8, 9               |
| Bias                      | 9      | Describe any efforts to address potential sources of bias                                                                                                                                                                                                                                                                                                                                                                                                              | 9, 10              |
| Study size                | 10     | Explain how the study size was arrived at                                                                                                                                                                                                                                                                                                                                                                                                                              | 6                  |
| Quantitative variables    | 11     | Explain how quantitative variables were handled in the analyses. If applicable, describe which groupings were chosen and why                                                                                                                                                                                                                                                                                                                                           | 8-10               |
| Statistical methods       | 12     | (a) Describe all statistical methods, including those used to control for confounding                                                                                                                                                                                                                                                                                                                                                                                  | 9, 10              |
|                           |        | (b) Describe any methods used to examine subgroups and interactions                                                                                                                                                                                                                                                                                                                                                                                                    | 9, 10              |
|                           |        | (c) Explain how missing data were addressed                                                                                                                                                                                                                                                                                                                                                                                                                            | 9, 10              |
|                           |        | (d) <i>Cohort study</i> —If applicable, explain how loss to follow-up was addressed<br><i>Case-control study</i> —If applicable, explain how matching of cases and controls was addressed                                                                                                                                                                                                                                                                              | 6                  |

|                          |     |                                                                                                                                                                                                              |        |
|--------------------------|-----|--------------------------------------------------------------------------------------------------------------------------------------------------------------------------------------------------------------|--------|
|                          |     | <i>Cross-sectional study</i> —If applicable, describe analytical methods taking account of sampling strategy                                                                                                 |        |
|                          |     | (e) Describe any sensitivity analyses                                                                                                                                                                        | 10     |
| <b>Results</b>           |     |                                                                                                                                                                                                              |        |
| Participants             | 13* | (a) Report numbers of individuals at each stage of study—eg numbers potentially eligible, examined for eligibility, confirmed eligible, included in the study, completing follow-up, and analysed            | 10, 22 |
|                          |     | (b) Give reasons for non-participation at each stage                                                                                                                                                         | -      |
|                          |     | (c) Consider use of a flow diagram                                                                                                                                                                           | -      |
| Descriptive data         | 14* | (a) Give characteristics of study participants (eg demographic, clinical, social) and information on exposures and potential confounders                                                                     | 10     |
|                          |     | (b) Indicate number of participants with missing data for each variable of interest                                                                                                                          | 22     |
|                          |     | (c) <i>Cohort study</i> —Summarise follow-up time (eg, average and total amount)                                                                                                                             | 6      |
| Outcome data             | 15* | <i>Cohort study</i> —Report numbers of outcome events or summary measures over time                                                                                                                          | 10-12  |
|                          |     | <i>Case-control study</i> —Report numbers in each exposure category, or summary measures of exposure                                                                                                         | -      |
|                          |     | <i>Cross-sectional study</i> —Report numbers of outcome events or summary measures                                                                                                                           | -      |
| Main results             | 16  | (a) Give unadjusted estimates and, if applicable, confounder-adjusted estimates and their precision (eg, 95% confidence interval). Make clear which confounders were adjusted for and why they were included | 10-12  |
|                          |     | (b) Report category boundaries when continuous variables were categorized                                                                                                                                    | 7, 10  |
|                          |     | (c) If relevant, consider translating estimates of relative risk into absolute risk for a meaningful time period                                                                                             | -      |
| Other analyses           | 17  | Report other analyses done—eg analyses of subgroups and interactions, and sensitivity analyses                                                                                                               | 9-12   |
| <b>Discussion</b>        |     |                                                                                                                                                                                                              |        |
| Key results              | 18  | Summarise key results with reference to study objectives                                                                                                                                                     | 13     |
| Limitations              | 19  | Discuss limitations of the study, taking into account sources of potential bias or imprecision. Discuss both direction and magnitude of any potential bias                                                   | 16     |
| Interpretation           | 20  | Give a cautious overall interpretation of results considering objectives, limitations, multiplicity of analyses, results from similar studies, and other relevant evidence                                   | 13-15  |
| Generalisability         | 21  | Discuss the generalisability (external validity) of the study results                                                                                                                                        | 16-17  |
| <b>Other information</b> |     |                                                                                                                                                                                                              |        |
| Funding                  | 22  | Give the source of funding and the role of the funders for the present study and, if applicable, for the original study on which the present article is based                                                | 18     |

\*Give information separately for cases and controls in case-control studies and, if applicable, for exposed and unexposed groups in cohort and cross-sectional studies.

**Note:** An Explanation and Elaboration article discusses each checklist item and gives methodological background and published examples of transparent reporting. The STROBE checklist is best used in conjunction with this article (freely available on the Web sites of PLoS Medicine at <http://www.plosmedicine.org/>, Annals of Internal Medicine at <http://www.annals.org/>, and Epidemiology at <http://www.epidem.com/>). Information on the STROBE Initiative is available at [www.strobe-statement.org](http://www.strobe-statement.org).

**Appendix 1. Percentage or Mean (SE) level for each outcome by survey wave and by imagery type**

| Outcomes,<br>Survey waves          | CANADA      |              |             |             | AUSTRALIA   |              |             | MEXICO      |              |             |
|------------------------------------|-------------|--------------|-------------|-------------|-------------|--------------|-------------|-------------|--------------|-------------|
|                                    | Wave        | Imagery Type |             |             | Wave        | Imagery Type |             | Wave        | Imagery Type |             |
|                                    |             | Graphic      | Suffering   | Symbolic    |             | Graphic      | Suffering   |             | Graphic      | Suffering   |
| <b>Noticing PHWs, %</b>            |             |              |             |             |             |              |             |             |              |             |
| Sep 2012                           | 55.82       | 59.40        | 66.57       | 56.30       | n/a         | n/a          | n/a         | 72.07       | 71.73        | 73.07       |
| Jan 2013                           | 62.12       | 64.25        | 72.99       | 63.40       | 82.16       | 81.78        | 82.91       | 74.39       | 73.37        | 76.07       |
| May 2013                           | 64.14       | 66.76        | 74.15       | 64.86       | 80.67       | 80.82        | 80.36       | 76.97       | 76.81        | 77.24       |
| Sep 2013                           | 62.74       | 64.85        | 71.51       | 63.79       | 79.23       | 79.32        | 79.07       | 81.11       | 79.95        | 83.03       |
| <b>Negative Affects, Mean (SE)</b> |             |              |             |             |             |              |             |             |              |             |
| Sep 2012                           | 5.37 (0.03) | 5.74 (0.04)  | 5.25 (0.04) | 4.35 (0.06) | n/a         | n/a          | n/a         | 6.09 (0.03) | 6.19 (0.03)  | 5.82 (0.05) |
| Jan 2013                           | 5.36 (0.03) | 5.73 (0.05)  | 5.21 (0.05) | 4.39 (0.06) | 4.99 (0.03) | 5.04 (0.04)  | 4.89 (0.06) | 6.06 (0.03) | 6.19 (0.03)  | 5.86 (0.04) |
| May 2013                           | 5.32 (0.03) | 5.68 (0.05)  | 5.17 (0.05) | 4.36 (0.06) | 4.93 (0.03) | 5.01 (0.04)  | 4.76 (0.06) | 5.96 (0.03) | 6.07 (0.03)  | 5.77 (0.04) |
| Sep 2013                           | 5.27 (0.03) | 5.61 (0.05)  | 5.16 (0.04) | 4.36 (0.06) | 4.98 (0.03) | 5.07 (0.04)  | 4.81 (0.06) | 5.91 (0.03) | 6.03 (0.03)  | 5.71 (0.04) |
| <b>Believability, Mean (SE)</b>    |             |              |             |             |             |              |             |             |              |             |
| Sep 2012                           | 6.07 (0.03) | 5.99 (0.05)  | 6.42 (0.04) | 5.77 (0.06) | n/a         | n/a          | n/a         | 6.80 (0.03) | 6.75 (0.03)  | 6.97 (0.05) |
| Jan 2013                           | 6.01 (0.03) | 5.93 (0.05)  | 6.34 (0.04) | 5.70 (0.06) | 5.35 (0.03) | 5.28 (0.04)  | 5.50 (0.06) | 6.74 (0.03) | 6.64 (0.03)  | 6.90 (0.04) |
| May 2013                           | 5.98 (0.03) | 5.89 (0.05)  | 6.28 (0.04) | 5.74 (0.06) | 5.39 (0.03) | 5.35 (0.04)  | 5.47 (0.06) | 6.68 (0.02) | 6.58 (0.03)  | 6.86 (0.04) |
| Sep 2013                           | 5.97 (0.03) | 5.94 (0.05)  | 6.22 (0.04) | 5.73 (0.06) | 5.36 (0.04) | 5.35 (0.04)  | 5.40 (0.06) | 6.63 (0.02) | 6.54 (0.03)  | 6.78 (0.04) |
| <b>Quit Motivation, Mean (SE)</b>  |             |              |             |             |             |              |             |             |              |             |
| Sep 2012                           | 5.07 (0.03) | 5.21 (0.05)  | 5.27 (0.05) | 4.22 (0.06) | n/a         | n/a          | n/a         | 6.07 (0.03) | 6.07 (0.03)  | 6.09 (0.06) |
| Jan 2013                           | 5.05 (0.03) | 5.22 (0.05)  | 5.19 (0.05) | 4.30 (0.06) | 4.46 (0.04) | 4.51 (0.05)  | 4.37 (0.07) | 6.16 (0.03) | 6.13 (0.04)  | 6.22 (0.05) |
| May 2013                           | 5.04 (0.03) | 5.20 (0.05)  | 5.17 (0.05) | 4.29 (0.06) | 4.47 (0.04) | 4.55 (0.04)  | 4.32 (0.07) | 6.03 (0.03) | 6.01 (0.04)  | 6.08 (0.05) |
| Sep 2013                           | 4.99 (0.03) | 5.13 (0.05)  | 5.16 (0.05) | 4.22 (0.06) | 4.58 (0.04) | 4.63 (0.05)  | 4.46 (0.07) | 5.97 (0.03) | 5.94 (0.04)  | 6.01 (0.05) |

| Outcomes,<br>Survey waves    | CANADA |              |           |          | AUSTRALIA |              |           | MEXICO |              |           |
|------------------------------|--------|--------------|-----------|----------|-----------|--------------|-----------|--------|--------------|-----------|
|                              | Wave   | Imagery Type |           |          | Wave      | Imagery Type |           | Wave   | Imagery Type |           |
|                              |        | Graphic      | Suffering | Symbolic |           | Graphic      | Suffering |        | Graphic      | Suffering |
| <b>Discussion of PHWs, %</b> |        |              |           |          |           |              |           |        |              |           |
| Sep 2012                     | 14.75  | 17.86        | 13.07     | 12.18    | n/a       | n/a          | n/a       | 31.65  | 31.00        | 33.56     |
| Jan 2013                     | 10.50  | 12.89        | 9.32      | 8.14     | 18.31     | 14.90        | 24.98     | 32.32  | 31.52        | 33.61     |
| May 2013                     | 9.96   | 11.37        | 9.50      | 8.06     | 13.14     | 10.85        | 17.73     | 30.56  | 30.16        | 31.22     |
| Sep 2013                     | 10.32  | 10.49        | 10.00     | 9.24     | 13.91     | 12.47        | 16.81     | 31.66  | 31.36        | 32.14     |



# BMJ Open

## Which type of tobacco product warning imagery is more effective and sustainable over time? A longitudinal assessment of smokers in Canada, Australia, and Mexico

|                                 |                                                                                                                                                                                                                                                                                                                                                                                                                                                                                                                                                         |
|---------------------------------|---------------------------------------------------------------------------------------------------------------------------------------------------------------------------------------------------------------------------------------------------------------------------------------------------------------------------------------------------------------------------------------------------------------------------------------------------------------------------------------------------------------------------------------------------------|
| Journal:                        | <i>BMJ Open</i>                                                                                                                                                                                                                                                                                                                                                                                                                                                                                                                                         |
| Manuscript ID                   | bmjopen-2018-021983.R1                                                                                                                                                                                                                                                                                                                                                                                                                                                                                                                                  |
| Article Type:                   | Research                                                                                                                                                                                                                                                                                                                                                                                                                                                                                                                                                |
| Date Submitted by the Author:   | 26-Mar-2018                                                                                                                                                                                                                                                                                                                                                                                                                                                                                                                                             |
| Complete List of Authors:       | Anshari, Dien; University of South Carolina, Health Promotion Education & Behavior; Universitas Indonesia, Department of Health Education and Behavioral Sciences<br>Yong, Hua; Cancer Council Victoria<br>Borland, Ron; Cancer Council Victoria<br>Hammond, David; University of Waterloo School of Public Health and Health Systems<br>Swayampakala, Kamala; University of South Carolina, Department of Health Promotion Education and Behavior<br>Thrasher, Jim; University of South Carolina, Department of Health Promotion, Education & Behavior |
| <b>Primary Subject Heading</b>: | Smoking and tobacco                                                                                                                                                                                                                                                                                                                                                                                                                                                                                                                                     |
| Secondary Subject Heading:      | Communication                                                                                                                                                                                                                                                                                                                                                                                                                                                                                                                                           |
| Keywords:                       | tobacco control, policy, communication, graphic warning                                                                                                                                                                                                                                                                                                                                                                                                                                                                                                 |
|                                 |                                                                                                                                                                                                                                                                                                                                                                                                                                                                                                                                                         |

SCHOLARONE™  
Manuscripts

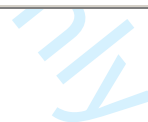

**Title:** Which type of tobacco product warning imagery is more effective and sustainable over time? A longitudinal assessment of smokers in Canada, Australia, and Mexico

**Authors:**

Dien Anshari<sup>1,2</sup>

Hua-Hie Yong<sup>3</sup>

Ron Borland<sup>3</sup>

David Hammond<sup>4</sup>

Kamala Swayampakala<sup>1</sup>

Jim Thrasher<sup>1</sup>

<sup>1</sup> Department of Health Promotion, Education and Behavior, Arnold School of Public Health, University of South Carolina, Columbia, SC, USA

<sup>2</sup> Department of Health Education and Behavioral Sciences, Faculty of Public Health, Universitas Indonesia, Depok, Jawa Barat, Indonesia

<sup>3</sup> Nigel Gray Fellowship Group, Cancer Council Victoria, Melbourne, Victoria 3004, Australia

<sup>4</sup> School of Public Health and Health Systems, University of Waterloo, Waterloo, ON, Canada

**Corresponding author:**

Dien Anshari

Department of Health Education and Behavioral Sciences

Faculty of Public Health

Universitas Indonesia

Tel: (+6221) 786-3475

Email: dienanshari@gmail.com

Number of words: (3969 // 4000 max)

Illustrations: 4 (5 max)

Supplementary data: 2 tables (no max)

References: 30 (no max)

1  
2  
3 **Abstract** (words: 261 // 300 max)  
4

5 **Objective.** This study examined smokers' responses to pictorial health warnings (PHWs) with  
6 different types of imagery under natural exposure conditions.  
7

8  
9 **Methods.** Adult smokers from online panels in Canada (n=2,357), Australia (n=1,671) and  
10 Mexico (n=2,537) were surveyed every four months from 2012 to 2013. Participants were shown  
11 PHWs on packs in their respective countries and asked about: 1) Noticing PHWs; 2) Negative  
12 affects toward PHWs; 3) Believability of PHWs; 4) PHW-stimulated discussions; and 5) Quit  
13 motivation due to PHWs. Country-specific generalized estimating equation models regressed  
14 these outcomes on time (i.e., survey wave), PHW imagery type (i.e., symbolic representations of  
15 risk; suffering from smoking; graphic depictions of bodily harm), and interactions between them.  
16  
17

18 **Results.** In all countries, PHW responses did not significantly change over time, except for  
19 increased noticing PHWs in Canada and Mexico, increased negative affect in Australia, and  
20 decreased negative affect in Mexico. For all outcomes, symbolic PHWs were rated lower than  
21 suffering and graphic PHWs in Canada (the only country with symbolic PHWs). Graphic PHWs  
22 were rated higher than suffering PHWs for negative affect (all countries), discussions (Canada),  
23 and quit motivation (Australia). Suffering PHWs were rated higher than graphic PHWs for  
24 noticing PHWs (Canada), believability (all countries), discussions (Australia & Mexico), and  
25 quit motivation (Mexico). Changes in noticing, believability and discussions varied somewhat  
26 by imagery type across countries.  
27  
28

29 **Conclusions.** The different PHW imagery appears to have different pathways of influence on  
30 adult smokers. Reactions to specific PHWs are similar over 1-2 years, suggesting that wear-out  
31 of PHW effects is due to decreased attention rather than the diminishing effectiveness of content.  
32  
33

34 **Keywords:** policy; tobacco control; communication; graphic warning  
35  
36  
37  
38  
39  
40  
41  
42  
43  
44  
45  
46  
47  
48  
49  
50  
51  
52  
53  
54  
55  
56  
57  
58  
59  
60

### Strengths and limitations of this study

- This study used a longitudinal assessment of smokers' responses under naturalistic and repeated exposure to PHWs to understand how different types of PHW imagery works over time.
- This study used measures of affective, cognitive and motivational responses of smokers exposed to PHWs with different types of imagery to understand the mechanisms for changes in responses over time.
- While other population-based studies used recalled impact of PHWs, this study presented specific PHWs that were on packs at the time of the survey to the participants.
- The differences in stimuli by country and within each category limit the interpretations around cross-country comparisons.
- Data for this study came from an online consumer panel which may limit the generalizability of the results to the broader population of smokers.

## INTRODUCTION

The World Health Organization's Framework Convention on Tobacco Control recommends that countries implement multiple, prominent pictorial health warnings (PHWs) to communicate about tobacco-related diseases.<sup>1</sup> Over 70 countries have implemented PHWs using a great variety of messages and imagery.<sup>2</sup> Previous experimental studies have shown that compared to the text-only warnings, PHWs are more salient,<sup>3</sup> believable,<sup>4</sup> elicit stronger negative affect, and more likely to motivate cessation.<sup>5-7</sup> Although observational studies indicate that all forms of PHW regimens lose their effectiveness over time,<sup>8</sup> the mechanisms for wear-out are uncertain, as are the conditions under which wear-out might be reversed. In particular, it is not clear whether wear-out effects are because smokers become inured to PHW messages or are just less likely to attend to them. Further, of the wide variety of imagery used in PHWs, no studies of which we are aware have examined whether some types of imagery work best over time.

Based on the fear appeal theory, the effects of messages vary with the level of gruesome content or with the level of negative reaction elicited from the messages.<sup>9,10</sup> Thus, the imagery used in PHWs can be classified according to the level of gruesome content (i.e., from the most frightening to the least frightening), and negative affect such as disgust can explain audience reaction to PHWs.<sup>11</sup> Some experimental studies have examined responses to different types of pictorial imagery on PHWs,<sup>12-16</sup> generally classifying PHW imagery into three main categories: 1) Graphic: Vivid depiction of negative health consequences or physical effects of smoking; 2) Suffering: Portrayal of personal experiences living with smoking-related diseases, including negative impacts on quality of life; and 3) Symbolic: Abstract or metaphorical representations of the negative effects of smoking. Previous experimental studies have consistently indicated that PHWs with graphic imagery elicit relatively stronger attentional, cognitive and behavioral

1  
2  
3 responses.<sup>12,13,17,18</sup> Furthermore, data from functional magnetic resonance imaging found that the  
4  
5 levels of activation of different neural regions involved in image interpretation and emotion  
6  
7 varied in a manner consistent with self-reported ratings of different PHWs imagery types.<sup>15</sup>  
8  
9  
10 Nevertheless, prior evidence on the superiority of certain types of images mainly came from pre-  
11  
12 market experimental studies, and there is very little research on the validity of pre-market  
13  
14 experiments for determining pictorial warning content that is most effective after policy  
15  
16 implementation. Longitudinal studies of smokers' responses under naturalistic, repeated  
17  
18 exposure to PHWs are needed to understand how different imagery works over time. Our study  
19  
20 aimed to fill that gap by embedding specific warning rating methods used in experimental  
21  
22 research into a longitudinal study design of consumer responses post-implementation of new  
23  
24 warnings.  
25  
26  
27

### 28 **Study Context**

29  
30  
31 Canada pioneered PHWs, implementing its first round in June 2001 with a set of 16  
32  
33 PHWs that covered 50% of the front and back of cigarette packs. In 2012, a new set of 16 PHWs  
34  
35 were implemented, covering 75% of the front and back of packs. In March 2006, Australia  
36  
37 implemented its first PHWs, which covered 30% of the front and 90% of the back of cigarette  
38  
39 packs. In December 2012, Australia introduced a new set of PHWs, rotating seven new PHWs  
40  
41 each year, and pioneered standardized packaging that required all tobacco products be sold in  
42  
43 dull, brown packages, with the same font and without company logos. Mexico first implemented  
44  
45 PHWs in September 2010, requiring PHWs that covered 30% of the front and a text-only  
46  
47 warning covering 100% of the back. Since 2012, four new PHWs were implemented every six  
48  
49 months.  
50  
51  
52  
53  
54  
55  
56  
57  
58  
59  
60

1  
2  
3 Using longitudinal data collected from adult smokers in Canada, Australia and Mexico,  
4 this study sought to examine: a) the affective, cognitive and motivational responses of smokers  
5 exposed to PHWs with different types of imagery (i.e., graphic, suffering, and symbolic); b)  
6 whether these responses changed over time; and c) whether the changes in responses over time  
7 depended on types of imagery. Other population-based studies have involved recalled impact of  
8 PHWs, in general; by contrast, this study presented specific PHWs that were on packs at the time  
9 of the survey, and queried smokers' ratings of these at the time of survey. This approach helps  
10 separate out potential habituation to the PHW message itself from the effects of attention toward  
11 PHWs.  
12  
13  
14  
15  
16  
17  
18  
19  
20  
21  
22  
23

## 24 **METHOD**

### 25 **Patient and Public Involvement**

26 This study did not involve patients nor the public as participants. Our study participants  
27 came from a consumer panel used for market research, all contact with participants was managed  
28 by a private company (GMI Lightspeed), and datasets we received did not include any  
29 information that would allow us to identify participants.  
30  
31  
32  
33  
34  
35  
36

### 37 **Sample**

38 Data for this study came from an online consumer panel of adult smokers followed up  
39 every four months in Canada, Australia and Mexico who were 18 to 64 years old, had smoked  
40 100 or more cigarettes in their lifetime, and had smoked at least once in the previous month.  
41 Sample size in each country was approximately 1,000 at each wave, with replenishment  
42 sampling used to maintain sample size across waves and to reduce the attrition bias. For this  
43 study, the analytic sample included only current smokers at each wave (see Table 1) as ex-  
44 smokers were less likely to be exposed to PHWs. Additionally, to be comparable, only data from  
45  
46  
47  
48  
49  
50  
51  
52  
53  
54  
55  
56  
57  
58  
59  
60

1  
2  
3 post-implementation period in each country were included in the analysis (i.e., in Canada and  
4 Mexico: 4 survey waves from September 2012 to September 2013; in Australia: 3 survey waves  
5 from January 2013 to September 2013). Reporting of this study adhered to the STROBE  
6  
7  
8 guidelines (Appendix 1).  
9

## 10 11 12 **Materials**

13  
14 PHWs used as stimuli varied across countries depending on the actual PHWs  
15 implemented in each country. To reduce participant burden, participants were presented with  
16 only a subset of PHWs that appeared on cigarette packs in their respective country during the  
17 study period. Each participant was presented and asked to rate each of the PHWs in the subset.  
18  
19 PHWs were selected to maximize the number with shared topical foci across countries. Of the 16  
20 PHWs on the market in Canada, we selected eight for our study (three suffering; three graphic;  
21 two symbolic). We also selected eight PHWs for Australia and Mexico; however, two of the  
22 PHWs for Australia were implemented after the study period, resulting in six PHWs analyzed for  
23 this study (i.e., two PHWs with suffering imagery and four PHWs with graphic imagery). Four  
24 new PHWs were introduced every six months in Mexico, where regulations do not require that  
25 packs with PHWs from prior rounds; Surveys in Mexico integrated some new PHWs while  
26 deleting others over time, resulting in 10 stimuli for this study (i.e., four PHWs with suffering  
27 imagery and six PHWs with graphic imagery; see Figure 1 for all stimuli used in this study by  
28 country and imagery type). PHW stimuli were presented in random order to account for ordering  
29 effects, and participants were asked a set of questions after viewing each of the stimuli.  
30  
31  
32  
33  
34  
35  
36  
37  
38  
39  
40  
41  
42  
43  
44  
45  
46  
47  
48

## 49 **Measures**

50  
51 *Main outcomes*  
52  
53  
54  
55  
56  
57  
58  
59  
60



1  
2  
3 Participants were asked about five topical domains for each PHW assessing affective,  
4 cognitive and motivational responses that have been shown to be important mediators for  
5 warning label impact.<sup>7,19,20</sup> Noticing PHW was assessed using one item (i.e., “In the last month,  
6 how often have you seen this warning on the cigarette packs that you buy?”), with responses  
7 ranging from 1 (never) to 5 (very often). Due to a skewed distribution, responses were  
8 dichotomized with 0 for those who answered never, and 1 for those who answered once to very  
9 often. Negative affect was measured using three items (i.e., “How much does this warning make  
10 you feel afraid?”; “How disgusting is this warning label?”; and “How much does this warning  
11 make you feel worried about the health risks of smoking?”) to which participants indicated  
12 agreement using a nine-point response scale with “not at all” and “extremely” at scale endpoints.  
13 Responses of these items were averaged to form a scale (range of Cronbach’s alpha across  
14 PHWs in Canada=0.86–0.91; Australia=0.86–0.93; Mexico=0.78–0.85). Message believability  
15 was measured using a single item (i.e., “How believable is this warning?”), and so was quit  
16 motivation (i.e., “How much does this warning make you want to quit smoking?”), with both  
17 using a 9-point response scale, as above. Lastly, discussion about warning in the past month was  
18 assessed (i.e., “In the last month, have you talked with anyone about this warning?”), with a  
19 “yes” or “no” answer.  
20  
21  
22  
23  
24  
25  
26  
27  
28  
29  
30  
31  
32  
33  
34  
35  
36  
37  
38  
39  
40  
41

#### 42 *Independent variables*

43  
44 Each PHW was classified by type of imagery used (i.e., graphic, suffering, and, in  
45 Canada only, symbolic), using dummy coding with suffering imagery as the reference group. We  
46 created dummy variables for survey waves ranging from wave 1 to wave 4 for Canada and  
47 Mexico (with wave 1 as the reference), and from wave 2 to wave 4 for Australia (with wave 2 as  
48 the reference).  
49  
50  
51  
52  
53  
54  
55  
56  
57  
58  
59  
60

### *Adjustment variables*

Adjustment variables included socio-demographic and smoking relevant variables. Socio-demographic variables included age group (18-24; 25-34; 35-44; 45-54; 55-64), gender, educational level (high school or less; some college or university; and completed university or higher), annual household income (Australia and Canada: \$29,999 or less, \$30,000-\$59,999, and \$60,000 or more; Mexico, monthly income, in pesos: \$5,000 or less, \$5,001-\$10,000, and \$10,001 or more), and race (for Canada only, white and non-white). Smoking-relevant variables included nicotine dependence, using the Heaviness of Smoking Index (HSI) that combined the number of cigarettes smoked per day and time to first cigarette of the day.<sup>21,22</sup> Intention to quit was measured by asking about plans to quit smoking (within the next month; within the next 6 months; sometime in the future, beyond 6 months; not planning to quit; don't know), with responses dichotomized to reflect intentions to quit smoking within the next month or six months versus other responses. Recent quit attempts were measured by asking if participants have made a quit attempt in the prior 4 months. Additionally, to control for possible instrumentation effects due to prior survey participation, we also assessed and created dummy variables for the number of prior surveys completed by participants, using their first participation as the reference.

### **Data analysis**

All analyses were conducted using Stata version 12, and were conducted separately by country due to the different PHWs assessed across countries. Each PHW was treated as a separate observation. To adjust for the correlated nature of the data and to maximize the number of cases available for analysis, generalized estimating equation (GEE) models with an exchangeable correlation matrix were used to compute parameter estimates. Separate bivariate and adjusted GEE models were estimated to assess the main effects of survey wave and PHW

1  
2  
3 imagery type on each of the outcomes. To assess linearity of trends over time, survey wave was  
4 treated as a continuous variable while controlling for adjustment variables; then a quadratic term  
5 (wave squared) was added to test for any nonlinearity in trends. For the final models, survey  
6 wave was treated as a categorical variable, and interaction terms between imagery type and  
7 survey wave were added into the models to test whether the patterns of change over time in  
8 outcomes of interest varied by PHW imagery type. Adjusted models included socio-demographics,  
9 smoking-related variables and time-in-sample. We also conducted some sensitivity analyses:  
10 First, for all models, we included variables to control media exposure that may coincided with  
11 PHW implementation that could also affect our study outcomes. The results were the same in  
12 terms of direction, magnitude and statistical significance. Second, we conducted sensitivity  
13 analyses with models regressing noticing PHWs as a continuous variable and as a dichotomous  
14 variable with different cut point, and regressing negative affect with the three original variables.  
15 Results were mostly consistent in terms of direction, magnitude, and statistical significance.

## 33 RESULTS

### 35 Sample Characteristics

37 Sample characteristics by country and survey wave are shown in Table 1. In baseline  
38 samples, over half of participants were women in Canada and Australia, while the reverse was  
39 true in Mexico. Most Mexican participants had some college or higher level of education, while  
40 about one third of Canadian and Australian participants had high school or less education.  
41 Compared to Canadian and Australian participants, Mexican participants were also younger, and  
42 had more non-daily smokers. The proportion of smokers who reported having attempted to quit  
43 was lower among Australian participants than those in Canada and Mexico.

### 54 Changes of PHW Responses Over Time

### *Noticing PHWs*

We dichotomized responses to 0 for those who answered never versus 1 for those who answered otherwise. Most respondents saw the warnings in the last month (55%-64% in Canada, 79%-82% in Australia, and 72%-81% in Mexico; see Appendix 2). In the adjusted model for Australia, no change in noticing PHWs over the study period was observed ( $p$ -value=0.528), with no statistically significant interaction to indicate a different pattern by imagery type. By contrast, noticing PHWs increased over the study period in both Canada and Mexico. In Canada, this increase was in a linear fashion ( $p$ -value=0.019) whereas in Mexico the trend was non-linear (quadratic trend  $p$ -value=0.004, Figure 2A). Main effects of imagery type on noticing PHWs also showed differences across countries. In Canada, symbolic images were less likely to be noticed than the suffering images and the graphic images (Table 2). Compared to the suffering images, graphic images were less likely to be noticed in Canada, but not in Australia or Mexico where no difference was observed (Table 2). A significant interaction between wave and imagery type was observed in Mexico suggesting the differences between PHWs with graphic and suffering images were significantly greater in the fourth waves ( $\chi^2=14.93$ ,  $p$ -value=0.027, Figure 2A).

### *Negative affect*

Ratings of negative affect elicited by PHWs showed different patterns of results across the three countries (Table 2). For main effects of survey wave, negative affective responses did not change in Canada, increased in Australia ( $p$ -value=0.027), and declined in Mexico ( $p$ -value=0.044). No differences in these trends were found by imagery type. Graphic PHWs were rated higher than suffering PHWs on negative affect in Canada, Australia, and Mexico. Canadian symbolic PHWs were rated lower on negative affect than suffering and graphic PHWs (Table 2).

### *Believability*

Adjusted models indicated no significant change in believability of PHWs over time in Canada ( $p$ -value=0.812), Australia ( $p$ -value=0.162), and Mexico ( $p$ -value=0.247). Compared to the suffering images, graphic images were rated lower on believability in Canada, Australia, and Mexico (Table 2). Also, in Canada, symbolic images were rated lower on believability than suffering and graphic images. A significant wave by imagery type interaction was observed in Canada ( $\chi^2=13.28$ ,  $p$ -value=0.039, Figure 2B), where believability ratings for graphic and symbolic PHWs seemed to increase while ratings of suffering PHWs declined in the fourth wave. In Australia, a significant wave by imagery type interaction was observed, with believability ratings increasing at a faster rate for graphic than for suffering PHWs ( $\chi^2=8.91$ ,  $p$ -value=0.012, Figure 2C).

#### *Quit motivation*

Main effects for survey waves indicated no changes in quit motivation ratings in Canada, Mexico, and Australia. For main effects of PHW imagery type, symbolic images in Canada were rated lower on quit motivation than suffering and graphic images. Graphic images were rated comparably to suffering images in Canada, but were rated higher in Australia, and lower in Mexico (Table 2). No statistically significant interaction between wave and imagery type was observed in any country.

#### *Discussion about PHWs*

Results for the main effects of survey wave showed no significant changes in discussions about PHWs in Canada ( $p$ -value=0.638), Australia ( $p$ -value=0.393), or Mexico ( $p$ -value=0.225). For the effects of imagery type, compared to suffering PHWs, graphic PHWs were more likely to be discussed in Canada, but less likely to be discussed in Australia and Mexico (Table 2). Canadian symbolic PHWs were less likely to be discussed than the graphic PHWs, but were no

1  
2  
3 different from the suffering PHWs (Table 2). Significant interactions between wave and imagery  
4  
5 type were observed for Canada ( $\chi^2=14.9$ ,  $p$ -value=0.021) and Australia ( $\chi^2=10.13$ ,  $p$ -  
6  
7 value=0.006). In Canada, discussion of graphic PHWs declined relative to suffering and  
8  
9 symbolic PHWs (Figure 2D). By contrast, in Australia, over time, suffering PHWs were less  
10  
11 likely to be discussed relative to graphic PHWs (Figure 2E).  
12  
13

## 14 15 **DISCUSSION**

16  
17 This study found that a range of desirable responses to PHWs (i.e., noticing, negative  
18  
19 affect, believability, quit motivation, and discussion about PHWs) were generally sustained over  
20  
21 the 12- to 16-month study period, with no evidence of wear-out except for negative affect  
22  
23 responses in Mexico. Our findings also indicate that smokers' responses to PHWs were  
24  
25 influenced by the type of imagery used and, in some cases, by country. Compared to those with  
26  
27 suffering imagery, PHWs with graphic imagery were only less noticeable in Canada, elicited  
28  
29 greater negative affect and less believability in all countries, but differed in motivating smokers  
30  
31 to quit and generating discussions in all countries.  
32  
33  
34

35  
36 Prior observational studies have found that smokers' responses to PHWs wear out over  
37  
38 time;<sup>8,23,24</sup> however, this wear out may be due to reduced attention to the warnings. Our findings  
39  
40 clearly show that when smokers are forced to view and evaluate PHWs, they do not lose their  
41  
42 potency or basic recognition over the study period of more than 1 year, suggesting that it may be  
43  
44 more meaningful to change the format and design of PHWs (e.g. background colors) in ways that  
45  
46 re-elicite increased attention, rather than changing the propositional content or imagery. Indeed,  
47  
48 this is consistent with Li et al who found no evidence of that two distinct sets of PHWs that  
49  
50 rotate annually reduced wear-out in Australia, including in the year when the second set  
51  
52 appeared for the first time.<sup>8</sup> However, the significant interaction between survey wave and  
53  
54  
55  
56  
57  
58  
59  
60

1  
2  
3 imagery type in Mexico showed different pattern with their PHWs became more believable in  
4 wave 3 and 4 with suffering imagery being rated higher than graphic imagery. The current study  
5 also provides some evidence that PHWs with suffering themed content are either equally or more  
6 initially attention-grabbing than other PHW imagery. This is consistent with research in other  
7 domains that show people's tendency to orient their attention toward facial stimuli over non-  
8 facial stimuli.<sup>25,26</sup> Additionally, our findings may, in part, reflect how PHW imagery can include  
9 both suffering and 'graphic' elements in addition to only facial portrayal of those who suffer  
10 from smoking related health issues. This is generally consistent with previous findings that  
11 PHWs featuring both graphic health effects and depictions of suffering are equally or more  
12 effective than graphic images alone.<sup>15,27</sup>

13  
14  
15  
16  
17  
18  
19  
20  
21  
22  
23  
24  
25  
26 For ratings of negative affect, we found mixed results across countries with no evidence  
27 of wear-out in Canada, an increase of negative affect ratings in Australia, and a decrease of the  
28 ratings in Mexico. It is unclear what the mechanisms responsible for the country differences  
29 might be, but one possible reason for this might be due to the differences in image size across  
30 countries. Our findings also provide support for past experimental studies that have found  
31 graphic PHWs are superior to other types of PHW imagery in term of eliciting negative  
32 affect,<sup>12,13,28</sup> which also support our classification of imagery type based on the level of  
33 gruesome content and the extent to which they elicit negative reactions.<sup>9,10</sup> Across all countries,  
34 graphic PHWs yielded higher ratings on negative affect than suffering PHWs, while symbolic  
35 PHWs in Canada were rated as being the least emotionally evocative. This is consistent with  
36 previous experiment that showed PHWs with symbolic imagery produce relatively lower neural  
37 activation.<sup>15</sup>

1  
2  
3 We found no wear-out for the believability ratings of PHWs, which is generally  
4 consistent with previous research that showed the believability of health warnings is sustained  
5 over time.<sup>29,30</sup> Our findings also support prior experimental research<sup>13,14</sup> that has found symbolic  
6 PHWs are the least believable imagery type. However, we also found that suffering PHWs were  
7 rated as the most believable across three countries, which is inconsistent with previous research  
8 that showed graphic PHWs as the most believable.<sup>13</sup> Interestingly, the relatively greater  
9 believability of suffering imagery in Canada and Australia converged over time with other types  
10 of imagery, suggesting that smokers may need longer time to accept the messages in graphic or  
11 symbolic PHWs.  
12  
13  
14  
15  
16  
17  
18  
19  
20  
21  
22  
23

24 We found that the relative effects of PHW imagery type on quit motivation were different  
25 across the countries, with no differences between graphic and suffering PHWs in Canada,  
26 whereas graphic PHWs were superior to suffering PHWs in Australia, while the reverse was  
27 found in Mexico. These mixed findings across the countries may reflect country differences,  
28 including differences in the number of stimuli selected for the study, the textual and topical  
29 content of each image type and/or the characteristics of the studied sample. Future studies are  
30 needed to examine this issue in a systematic manner. Nevertheless, effects of different imagery  
31 types on quit motivation appears sustained over time in all three countries with some evidence  
32 that this effect gradually increased in Australia, the only country that has implemented plain  
33 packaging.  
34  
35  
36  
37  
38  
39  
40  
41  
42  
43  
44  
45  
46

47 The ability of different PHW imagery types to stimulate discussion also appears different  
48 across countries. In Canada, graphic PHWs were superior to suffering and symbolic PHWs in  
49 stimulating discussion, but the effect was not sustained and declined to similar levels as for other  
50 imagery types over the study period. In Australia and Mexico, however, the pattern was in the  
51  
52  
53  
54  
55  
56  
57  
58  
59  
60



1  
2  
3 opposite direction, with suffering PHWs being superior to graphic PHWs for stimulating  
4  
5 discussion. This effect remained steady in Mexico, but not in Australia where the superiority of  
6  
7 suffering PHWs declined to the same levels as graphic PHWs over the study period. Again, it is  
8  
9 unclear what the mechanisms responsible for the country differences might be. One possible  
10  
11 reason for the divergent findings might be due to the combination of different features of the  
12  
13 warnings (e.g., image size, color formatting, etc.), the relative novelty and the number of years  
14  
15 since the change in image content across the countries.  
16  
17

### 18 19 *Limitation*

20  
21 Our study has several limitations. Our main limitation is the differences in stimuli by  
22  
23 country and within each category, and in some cases within country over time. Hence,  
24  
25 interpretations around cross-country comparisons should be tempered by this regard. We aimed  
26  
27 to assess the actual PHWs implemented in each country, but we could not assess them all due to  
28  
29 the differences in the numbers and in the rotation of PHWs in each country. This resulted in an  
30  
31 unbalanced number of stimuli across the imagery type and the countries. More formal tests of  
32  
33 mediation may help determine whether the balance of imagery on warnings should be in favor of  
34  
35 one type or another. With only a few examples of each class of warnings, our findings could be  
36  
37 due to the quality of the textual content or other message features, not necessarily the way we  
38  
39 have categorized the images. Consistent effects of the messages would have provided a stronger  
40  
41 evidence for our categorization. Second, data for this study came from an online consumer panel  
42  
43 that were gathered from no known sampling frame, which limited the ability to generalize the  
44  
45 results to the broader population of smokers. However, the sample was designed to be  
46  
47 comparable to population of smokers in each country except Mexico, where smokers with higher  
48  
49 educational level are overrepresented due to differential Internet penetration. Lastly, with  
50  
51  
52  
53  
54  
55  
56  
57  
58  
59  
60

1  
2  
3 moderate retention rates (about 50%), our study results could be affected by non-response and  
4  
5 attrition biases although all the estimates were adjusted for survey participation frequency,  
6  
7 sociodemographic and smoking-related variables.  
8  
9

### 10 *Conclusion*

11  
12 Our study was the first to assess over-time reactions to specific types of PHW imagery  
13  
14 under conditions of natural exposure. Using a recognition task paradigm, this study shows that  
15  
16 when PHWs are attended to, they do not lose their potency over time suggesting that past  
17  
18 findings of wear-outs may be due to less attention being paid to the PHWs over time. Future  
19  
20 research can assess whether changing the design elements rather than just the propositional  
21  
22 contents of PHWs may be a more effective way to maintain warning impact. Such research will  
23  
24 be useful as over 100 countries have rotating pictorial warnings for which they have the  
25  
26 opportunity to change warning content & design. Our study also shows that PHWs with suffering  
27  
28 and graphic imagery appear to have different routes of impact and may work in complementary  
29  
30 fashion in achieving the intended effects of PHWs.  
31  
32  
33  
34  
35  
36  
37  
38  
39  
40  
41  
42  
43  
44  
45  
46  
47  
48  
49  
50  
51  
52  
53  
54  
55  
56  
57  
58  
59  
60

1  
2  
3  
4  
5  
6 **Acknowledgments.**

7  
8 **Contributors.** DA contributed to devising methodological approach, analyzed the data and  
9 drafted the manuscript. H-HY and KS assisted with data analysis and interpretation of results. JT  
10 conceptualized, designed the project, and obtained research funding. RB and DH contributed to  
11 the interpretation of findings. DA, H-HY, RB, DH, KS, JT contributed to successive drafts, and  
12 approved the final manuscript.  
13

14  
15 **Funding.** This research is funded by a grant from the National Cancer Institute at the National  
16 Institutes of Health (R01-CA167067).  
17

18 **Competing interests.** None declared.  
19

20 **Ethics approval.** The Institutional Review Boards at the University of South Carolina and at the  
21 University of Waterloo.  
22

23  
24 **Provenance and peer review.** Not commissioned; externally peer reviewed.  
25

26 **Data sharing statement.** No additional data are available.  
27  
28  
29  
30  
31  
32  
33  
34  
35  
36  
37  
38  
39  
40  
41  
42  
43  
44  
45  
46  
47  
48  
49  
50  
51  
52  
53  
54  
55  
56  
57  
58  
59  
60

## References

1. World Health Organization. *WHO Framework Convention on Tobacco Control*. WHO; 2005.
2. Canadian Cancer Society. *Cigarette Package Health Warnings: International Status Report (5th Ed.)*; 2016.
3. Peters E, Romer D, Slovic P, et al. The impact and acceptability of Canadian-style cigarette warning labels among U.S. smokers and nonsmokers. *Nicotine Tob Res*. 2007;9(4):473-81. doi:10.1080/14622200701239639.
4. Cantrell J, Vallone DM, Thrasher JF, et al. Impact of tobacco-related health warning labels across socioeconomic, race and ethnic groups: results from a randomized web-based experiment. *PLoS One*. 2013;8(1):e52206. doi:10.1371/journal.pone.0052206.
5. Andrews JC, Netemeyer RG, Burton S, Kees J. Effects of plain package branding and graphic health warnings on adolescent smokers in the USA, Spain and France. *Tob Control*. 2016:tobaccocontrol-2015-052583. doi:10.1136/tobaccocontrol-2015-052583.
6. Kees J, Burton S, Andrews JC, Kozup J. Understanding how graphic pictorial warnings work on cigarette packaging. *J Public Policy Mark*. 2010;29(2):265-276. doi:10.1016/j.tree.2009.02.010.
7. Noar SM, Hall MG, Francis DB, Ribisl KM, Pepper JK, Brewer NT. Pictorial cigarette pack warnings: a meta-analysis of experimental studies. *Tob Control*. 2016:341-354. doi:10.1136/tobaccocontrol-2014-051978.
8. Li L, Borland R, Yong H, et al. Longer term impact of cigarette package warnings in Australia compared with the United Kingdom and Canada. *Health Educ Res*. 2015;30(1):67-80. doi:10.1093/her/cyu074.
9. Witte K. Putting the fear back into fear appeals: The extended parallel process model. *Commun Monogr*. 1992;59(4):329-349. doi:10.1080/03637759209376276.
10. O'Keefe DJ. *Persuasion: Theory and Research*. Newberry Park, CA: Sage; 1990.
11. Humphris G, Williams B. Is disgust the driver behind the selection of images for UK tobacco packets? *Health Educ J*. 2014;73(5):522-529. doi:10.1177/0017896913496399.
12. Hammond D, Thrasher JF, Reid JL, Driezen P, Boudreau C, Santillán EA. Perceived effectiveness of pictorial health warnings among Mexican youth and adults: a population-level intervention with potential to reduce tobacco-related inequities. *Cancer Causes Control*. 2012;23:57-67. doi:10.1007/s10552-012-9902-4.
13. Thrasher JF, Carpenter MJ, Andrews JO, et al. Cigarette warning label policy alternatives and smoking-related health disparities. *Am J Prev Med*. 2012;43(6):590-600. doi:10.1016/j.amepre.2012.08.025.
14. Huang L-L, Thrasher JF, Reid JL, Hammond D. Predictive and External Validity of a Pre-Market Study to Determine the Most Effective Pictorial Health Warning Label Content for Cigarette Packages. *Nicotine Tob Res*. 2016;18(5):1376-81. doi:10.1093/ntr/ntv184.
15. Newman-Norlund RD, Thrasher JF, Fridriksson J, et al. Neural biomarkers for assessing different types of imagery in pictorial health warning labels for cigarette packaging: a cross-sectional study. *BMJ Open*. 2014;4(12):e006411. doi:10.1136/bmjopen-2014-006411.
16. Cameron LD, Pepper JK, Brewer NT. Responses of young adults to graphic warning labels for cigarette packages. *Tob Control*. 2013. doi:10.1136/tobaccocontrol-2012-050645.
17. Fong GT, Hammond D, Jiang Y, et al. Perceptions of tobacco health warnings in China

- 1  
2  
3 compared with picture and text-only health warnings from other countries: an  
4 experimental study. *Tob Control*. 2010;19(Suppl 2):i69-i77. doi:10.1136/tc.2010.036483.
- 5 18. Malouff JM, Schutte NS, Rooke SE, MacDonell G. Effects on smokers of exposure to  
6 graphic warning images. *Am J Addict*. 2012;21(6):555-7. doi:10.1111/j.1521-  
7 0391.2012.00284.x.
- 8 19. Emery LF, Romer D, Sheerin KM, Jamieson KH, Peters E. Affective and cognitive  
9 mediators of the impact of cigarette warning labels. *Nicotine Tob Res*. 2014;16(3):263-9.  
10 doi:10.1093/ntr/ntt124.
- 11 20. Yong H-H, Borland R, Thrasher JF, et al. Mediation pathways of the impact of cigarette  
12 warning labels on quit attempts. *Heal Psychol*. 2014;33(11):1410-1420.  
13 doi:http://dx.doi.org/10.1037/hea0000056.
- 14 21. Borland R, Yong H-H, O'Connor RJ, Hyland A, Thompson ME. The reliability and  
15 predictive validity of the Heaviness of Smoking Index and its two components: findings  
16 from the International Tobacco Control Four Country study. *Nicotine Tob Res*. 2010;12  
17 Suppl:S45-50. doi:10.1093/ntr/ntq038.
- 18 22. Heatherton TF, Kozlowski LT, Frecker RC, Rickert W, Robinson J. Measuring the  
19 Heaviness of Smoking: using self-reported time to the first cigarette of the day and  
20 number of cigarettes smoked per day. *Addiction*. 1989;84(7):791-800. doi:10.1111/j.1360-  
21 0443.1989.tb03059.x.
- 22 23. Borland R, Wilson N, Fong GT, et al. Impact of graphic and text warnings on cigarette  
23 packs: findings from four countries over five years. *Tob Control*. 2009;18(5):358-64.  
24 doi:10.1136/tc.2008.028043.
- 25 24. Hitchman SC, Driezen P, Logel C, Hammond D, Fong GT. Changes in effectiveness of  
26 cigarette health warnings over time in Canada and the United States, 2002-2011. *Nicotine  
27 Tob Res*. 2014;16(5):536-43. doi:10.1093/ntr/ntt196.
- 28 25. Bindemann M, Burton AM, Hooge ITC, Jenkins R, de Haan EHF. Faces retain attention.  
29 *Psychon Bull Rev*. 2005;12(6):1048-53.
- 30 26. Langton SRH, Law AS, Burton AM, Schweinberger SR. Attention capture by faces.  
31 *Cognition*. 2008;107(1):330-342. doi:10.1016/j.cognition.2007.07.012.
- 32 27. Hammond D. Health warning messages on tobacco products: a review. *Tob Control*.  
33 2011;20(5):327-37. doi:10.1136/tc.2010.037630.
- 34 28. Thrasher JF, Arillo-Santillán E, Villalobos V, et al. Can pictorial warning labels on  
35 cigarette packages address smoking-related health disparities? Field experiments in  
36 Mexico to assess pictorial warning label content. *Cancer Causes Control*. 2012;23 Suppl  
37 1:69-80. doi:10.1007/s10552-012-9899-8.
- 38 29. Environics. *The health effects of tobacco and health warning messages on cigarette  
39 packages: Survey of adults and adult smokers*. Toronto; 2002.
- 40 30. Shanahan P, Elliott D. *Evaluation of the Effectiveness of the Graphic Health Warnings on  
41 Tobacco Product Packaging 2008 – Full Report*. Canberra; 2008.
- 42  
43  
44  
45  
46  
47  
48  
49  
50  
51  
52  
53  
54  
55  
56  
57  
58  
59  
60

1  
2  
3  
4  
5  
6  
7  
8  
9  
10  
11  
12  
13  
14  
15  
16  
17  
18  
19  
20  
21  
22  
23  
24  
25  
26  
27  
28  
29  
30  
31  
32  
33  
34  
35  
36  
37  
38  
39  
40  
41  
42  
43  
44  
45  
46  
47  
48  
49  
50  
51  
52  
53  
54  
55  
56  
57  
58  
59  
60

**Figure 1. Study stimuli for each country, by imagery type.**

**Figure 2. Trends of noticing, believability, and discussion of PHWs.**

For peer review only

**Table 1. Characteristics of current smokers at each survey wave by country (in %)**

|                                         | CANADA |      |      |       | AUSTRALIA |      |      | MEXICO |      |      |      |
|-----------------------------------------|--------|------|------|-------|-----------|------|------|--------|------|------|------|
|                                         | W1     | W2   | W3   | W4    | W2        | W3   | W4   | W1     | W2   | W3   | W4   |
| <b>N =</b>                              | 1,000  | 969  | 964  | 967   | 970       | 963  | 968  | 1,000  | 956  | 956  | 948  |
| <b>Age</b>                              |        |      |      |       |           |      |      |        |      |      |      |
| 18-24                                   | 13.7   | 12.8 | 11.3 | 12.1  | 7.7       | 7.9  | 7.8  | 20.0   | 20.1 | 20.2 | 20.6 |
| 25-34                                   | 22.2   | 22.0 | 22.9 | 22.7  | 22.1      | 23.3 | 24.7 | 30.0   | 29.9 | 30.0 | 32.2 |
| 35-44                                   | 22.2   | 21.6 | 21.9 | 20.5  | 22.5      | 23.5 | 23.5 | 20.0   | 20.0 | 19.8 | 19.1 |
| 45-54                                   | 20.3   | 20.9 | 21.4 | 22.5  | 24.1      | 22.4 | 22.6 | 15.0   | 14.8 | 15.1 | 15.0 |
| 55-64                                   | 21.6   | 22.7 | 22.5 | 22.2  | 23.6      | 22.9 | 21.4 | 15.0   | 15.2 | 14.9 | 13.1 |
| <b>Sex</b>                              |        |      |      |       |           |      |      |        |      |      |      |
| Male                                    | 40.5   | 43.0 | 44.4 | 46.3  | 41.3      | 43.6 | 47.8 | 54.8   | 54.7 | 52.8 | 55.9 |
| Female                                  | 59.5   | 57.0 | 55.6 | 53.7  | 58.7      | 56.4 | 52.2 | 45.2   | 45.3 | 47.2 | 44.1 |
| <b>Education</b>                        |        |      |      |       |           |      |      |        |      |      |      |
| High school or less                     | 30.1   | 33.7 | 37.4 | 31.3  | 38.7      | 37.0 | 29.9 | 6.1    | 6.6  | 6.5  | 3.3  |
| College or some university              | 43.8   | 46.5 | 47.1 | 42.9  | 42.1      | 43.2 | 41.9 | 47.7   | 55.7 | 61.3 | 44.6 |
| Completed university or higher          | 26.1   | 19.8 | 15.5 | 25.8  | 19.3      | 19.8 | 28.2 | 46.2   | 37.7 | 32.2 | 52.1 |
| <b>Income</b>                           |        |      |      |       |           |      |      |        |      |      |      |
| Low                                     | 28.4   | 27.7 | 28.8 | 24.9  | 24.4      | 23.6 | 22.7 | 46.3   | 43.0 | 42.7 | 38.9 |
| Middle                                  | 32.6   | 32.1 | 31.5 | 31.3  | 25.5      | 28.4 | 27.4 | 29.5   | 35.0 | 34.1 | 32.8 |
| High                                    | 39.0   | 40.2 | 39.7 | 43.8  | 50.2      | 48.0 | 49.9 | 24.2   | 22.0 | 23.2 | 28.3 |
| <b>Smoking Intensity</b>                |        |      |      |       |           |      |      |        |      |      |      |
| non-daily                               | 22.0   | 15.9 | 16.5 | 18.3  | 12.3      | 12.8 | 13.2 | 51.2   | 52.8 | 49.3 | 50.5 |
| daily, 10 cpd or less                   | 23.7   | 28.8 | 25.1 | 27.8  | 23.1      | 24.3 | 25.4 | 33.7   | 30.3 | 34.3 | 33.1 |
| daily, more than 10 cpd                 | 54.3   | 55.3 | 58.4 | 53.9  | 64.6      | 62.9 | 61.4 | 15.1   | 16.8 | 16.4 | 16.4 |
| <b>Quit intentions in next 6-months</b> |        |      |      |       |           |      |      |        |      |      |      |
| Yes                                     | 47.3   | 43.5 | 41.8 | 43.02 | 40.1      | 39.7 | 41.5 | 40.6   | 47.5 | 46.6 | 46.6 |
| No                                      | 52.7   | 56.5 | 58.2 | 56.98 | 59.9      | 60.3 | 58.5 | 59.4   | 52.5 | 53.4 | 53.4 |
| <b>Quit attempts in past 4-months</b>   |        |      |      |       |           |      |      |        |      |      |      |
| Yes                                     | 41.7   | 40.0 | 37.2 | 38.2  | 34.0      | 34.0 | 35.5 | 48.0   | 53.2 | 55.0 | 52.7 |
| No                                      | 58.3   | 60.0 | 62.8 | 61.8  | 66.0      | 66.0 | 64.5 | 52.0   | 46.8 | 45.0 | 47.3 |

Note: Country differences in sample characteristics at baseline wave were all significant ( $p < 0.01$  for quit intention and  $p < 0.001$  for others); cpd, cigarette per day.

**Table 2. Final GEE model showing main effects of wave and image type, along with any significant interaction between wave and image type**

| Outcomes,<br>Independent Variables                   | CANADA       |                |        | AUSTRALIA    |                |        | MEXICO       |                |        |
|------------------------------------------------------|--------------|----------------|--------|--------------|----------------|--------|--------------|----------------|--------|
|                                                      | est          | 95% CI         | P>z    | est          | 95% CI         | P>z    | est          | 95% CI         | P>z    |
| <b>Noticing PHW, OR (95% CI)</b>                     |              |                |        |              |                |        |              |                |        |
| Survey Wave                                          |              |                | 0.019  |              |                | 0.528  |              |                | <0.001 |
| wave 1                                               | ref          |                |        | ref          |                |        | ref          |                |        |
| wave 2                                               | 1.08         | (0.95, 1.23)   | 0.229  | n/a          |                |        | 1.05         | (0.88, 1.25)   | 0.620  |
| wave 3                                               | <b>1.26</b>  | (1.09, 1.47)   | 0.002  | 1.12         | (0.92, 1.37)   | 0.258  | 1.20         | (1.00, 1.44)   | 0.056  |
| wave 4                                               | 1.18         | (1.00, 1.40)   | 0.055  | 1.08         | (0.85, 1.38)   | 0.521  | <b>1.81</b>  | (1.48, 2.20)   | <0.001 |
| Image Type                                           |              |                | <0.001 |              |                | 0.545  |              |                | 0.363  |
| Suffering                                            | ref          |                |        | ref          |                |        | ref          |                |        |
| Symbolic                                             | <b>0.65</b>  | (0.61, 0.69)   | <0.001 | n/a          |                |        | n/a          |                |        |
| Graphic                                              | <b>0.70</b>  | (0.66, 0.74)   | <0.001 | 0.98         | (0.91, 1.05)   | 0.545  | 0.95         | (0.86, 1.06)   | 0.363  |
| Wave x Image interaction                             |              |                |        |              |                |        |              |                | 0.027  |
| wave 2 x symbolic                                    | n/a          |                |        | n/a          |                |        | n/a          |                |        |
| wave 2 x graphic                                     | n/a          |                |        | n/a          |                |        | 0.92         | (0.80, 1.05)   | 0.219  |
| wave 3 x symbolic                                    | n/a          |                |        | n/a          |                |        | n/a          |                |        |
| wave 3 x graphic                                     | n/a          |                |        | n/a          |                |        | 1.04         | (0.90, 1.20)   | 0.624  |
| wave 4 x symbolic                                    | n/a          |                |        | n/a          |                |        | n/a          |                |        |
| wave 4 x graphic                                     | n/a          |                |        | n/a          |                |        | <b>0.86</b>  | (0.74, 0.99)   | 0.034  |
| <b>Negative Affects, <math>\beta</math> (95% CI)</b> |              |                |        |              |                |        |              |                |        |
| Survey Wave                                          |              |                | 0.629  |              |                | 0.027  |              |                | 0.044  |
| wave 1                                               | ref          |                |        | n/a          |                |        | ref          |                |        |
| wave 2                                               | 0.06         | (-0.08, 0.20)  | 0.384  | ref          |                |        | 0.00         | (-0.14, 0.15)  | 0.950  |
| wave 3                                               | 0.08         | (-0.11, 0.28)  | 0.402  | <b>0.22</b>  | (0.03, 0.40)   | 0.021  | -0.06        | (-0.24, 0.13)  | 0.550  |
| wave 4                                               | 0.03         | (-0.23, 0.28)  | 0.837  | <b>0.36</b>  | (0.09, 0.63)   | 0.009  | <b>-0.25</b> | (-0.47, -0.02) | 0.031  |
| Image Type                                           |              |                | <0.001 |              |                | <0.001 |              |                | <0.001 |
| Suffering                                            | ref          |                |        | ref          |                |        | ref          |                |        |
| Symbolic                                             | <b>-0.85</b> | (-0.90, -0.80) | <0.001 | n/a          |                |        | n/a          |                |        |
| Graphic                                              | <b>0.49</b>  | (0.45, 0.52)   | <0.001 | <b>0.22</b>  | (0.17, 0.27)   | <0.001 | <b>0.33</b>  | (0.29, 0.35)   | <0.001 |
| <b>Believability, <math>\beta</math> (95% CI)</b>    |              |                |        |              |                |        |              |                |        |
| Survey Wave                                          |              |                | 0.812  |              |                | 0.162  |              |                | 0.247  |
| wave 1                                               | ref          |                |        | n/a          |                |        | ref          |                |        |
| wave 2                                               | 0.01         | (-0.14, 0.17)  | 0.868  | ref          |                |        | -0.10        | (-0.24, 0.04)  | 0.177  |
| wave 3                                               | 0.04         | (-0.18, 0.26)  | 0.722  | 0.15         | (-0.06, 0.36)  | 0.155  | -0.09        | (-0.25, 0.08)  | 0.301  |
| wave 4                                               | -0.04        | (-0.31, 0.24)  | 0.787  | 0.29         | (-0.01, 0.56)  | 0.057  | -0.18        | (-0.38, 0.01)  | 0.064  |
| Image Type                                           |              |                | <0.001 |              |                | <0.001 |              |                | <0.001 |
| Suffering                                            | ref          |                |        | ref          |                |        | ref          |                |        |
| Symbolic                                             | <b>-0.65</b> | (-0.74, -0.56) | <0.001 | n/a          |                |        | n/a          |                |        |
| Graphic                                              | <b>-0.43</b> | (-0.51, -0.35) | <0.001 | <b>-0.22</b> | (-0.30, -0.14) | <0.001 | <b>-0.24</b> | (-0.28, -0.21) | <0.001 |



| Outcomes,<br>Independent Variables                  | CANADA       |                |        | AUSTRALIA   |               |        | MEXICO       |                |        |
|-----------------------------------------------------|--------------|----------------|--------|-------------|---------------|--------|--------------|----------------|--------|
|                                                     | est          | 95% CI         | P>z    | est         | 95% CI        | P>z    | est          | 95% CI         | P>z    |
| Wave x Image interaction                            |              |                | 0.039  |             |               | 0.012  |              |                |        |
| wave 2 x symbolic                                   | 0.00         | (-0.12, 0.12)  | 0.998  | n/a         |               |        | n/a          |                |        |
| wave 2 x graphic                                    | 0.02         | (-0.08, 0.13)  | 0.677  | n/a         |               |        | n/a          |                |        |
| wave 3 x symbolic                                   | 0.07         | (-0.05, 0.19)  | 0.254  | n/a         |               |        | n/a          |                |        |
| wave 3 x graphic                                    | 0.03         | (-0.08, 0.13)  | 0.645  | 0.09        | (-0.01, 0.19) | 0.092  | n/a          |                |        |
| wave 4 x symbolic                                   | <b>0.15</b>  | (0.03, 0.27)   | 0.012  | n/a         |               |        | n/a          |                |        |
| wave 4 x graphic                                    | <b>0.14</b>  | (0.03, 0.24)   | 0.009  | <b>0.16</b> | (0.05, 0.26)  | 0.003  | n/a          |                |        |
| <b>Quit Motivation, <math>\beta</math> (95% CI)</b> |              |                |        |             |               |        |              |                |        |
| Survey Wave                                         |              |                | 0.646  |             |               | 0.062  |              |                | 0.263  |
| wave 1                                              | ref          |                |        | n/a         |               |        | ref          |                |        |
| wave 2                                              | 0.04         | (-0.12, 0.20)  | 0.630  | ref         |               |        | 0.04         | (-0.12, 0.20)  | 0.624  |
| wave 3                                              | 0.12         | (-0.09, 0.34)  | 0.264  | 0.21        | (0.00, 0.43)  | 0.052  | -0.03        | (-0.24, 0.18)  | 0.769  |
| wave 4                                              | 0.08         | (-0.19, 0.34)  | 0.577  | <b>0.34</b> | (0.05, 0.63)  | 0.021  | -0.17        | (-0.42, 0.09)  | 0.195  |
| Image Type                                          |              |                | <0.001 |             |               | <0.001 |              |                | <0.001 |
| Suffering                                           | ref          |                |        | ref         |               |        | ref          |                |        |
| Symbolic                                            | <b>-0.96</b> | (-1.01, -0.90) | <0.001 | n/a         |               |        | n/a          |                |        |
| Graphic                                             | -0.01        | (-0.05, 0.03)  | 0.478  | <b>0.18</b> | (0.12, 0.23)  | <0.001 | <b>-0.07</b> | (-0.10, -0.03) | <0.001 |
| <b>Discussion about PHWs, OR (95% CI)</b>           |              |                |        |             |               |        |              |                |        |
| Survey Wave                                         |              |                | 0.638  |             |               | 0.393  |              |                | 0.225  |
| wave 1                                              | ref          |                |        | ref         |               |        | ref          |                |        |
| wave 2                                              | 0.85         | (0.65, 1.11)   | 0.224  | n/a         |               |        | 1.12         | (0.95, 1.32)   | 0.172  |
| wave 3                                              | 0.89         | (0.68, 1.18)   | 0.430  | 0.92        | (0.75, 1.13)  | 0.441  | 0.97         | (0.82, 1.17)   | 0.731  |
| wave 4                                              | 0.96         | (0.73, 1.27)   | 0.792  | 0.84        | (0.65, 1.08)  | 0.172  | 1.06         | (0.89, 1.27)   | 0.518  |
| Image Type                                          |              |                | <0.001 |             |               | <0.001 |              |                | 0.004  |
| Suffering                                           | ref          |                |        | ref         |               |        | ref          |                |        |
| Symbolic                                            | 0.83         | (0.67, 1.01)   | 0.063  | n/a         |               |        | n/a          |                |        |
| Graphic                                             | <b>1.41</b>  | (1.20, 1.65)   | <0.001 | <b>0.53</b> | (0.46, 0.61)  | <0.001 | <b>0.94</b>  | (0.90, 0.98)   | 0.004  |
| Wave x Image interaction                            |              |                | 0.021  |             |               | 0.006  |              |                |        |
| wave 2 x symbolic                                   | 0.98         | (0.75, 1.29)   | 0.888  | n/a         |               |        | n/a          |                |        |
| wave 2 x graphic                                    | 0.98         | (0.79, 1.22)   | 0.847  | n/a         |               |        | n/a          |                |        |
| wave 3 x symbolic                                   | 0.97         | (0.72, 1.30)   | 0.842  | n/a         |               |        | n/a          |                |        |
| wave 3 x graphic                                    | 0.87         | (0.69, 1.09)   | 0.232  | 1.05        | (0.87, 1.26)  | 0.634  | n/a          |                |        |
| wave 4 x symbolic                                   | 1.04         | (0.78, 1.38)   | 0.795  | n/a         |               |        | n/a          |                |        |
| wave 4 x graphic                                    | <b>0.70</b>  | (0.57, 0.88)   | 0.002  | <b>1.33</b> | (1.10, 1.61)  | 0.004  | n/a          |                |        |

Note: est, estimate;  $\beta$ , regression coefficient; OR, odds ratio; CI, confidence interval; n/a, not applicable;

Interaction and stratification models were adjusted. Adjustment variables include: age, sex, educational level, income level, quit intention in the next 6 months, quit attempt, Heaviness of Smoking Index, daily smoking status, time in sample, and race (Canada only).

1  
2  
3  
4  
5  
6  
7  
8  
9  
10  
11  
12  
13  
14  
15  
16  
17  
18  
19  
20  
21  
22  
23  
24  
25  
26  
27  
28  
29  
30  
31  
32  
33  
34  
35  
36  
37  
38  
39  
40  
41  
42  
43  
44  
45  
46  
47  
48  
49  
50  
51  
52  
53  
54  
55  
56  
57  
58  
59  
60

| Country     | PHW Imagery Type                                                                   |                                                                                   |                                                                                     |
|-------------|------------------------------------------------------------------------------------|-----------------------------------------------------------------------------------|-------------------------------------------------------------------------------------|
|             | Suffering                                                                          | Symbolic                                                                          | Graphic                                                                             |
| Canada      |   |  |   |
| Australia * |   | <p>Not included</p>                                                               |   |
| Mexico      |  | <p>Not included</p>                                                               |  |

Notes:  
 \* Included only PHWs from the first set of 7 new health warnings on standardized packaging implemented in December 2012 in Australia.  
 All images are in the public domain, as they are images that are printed on cigarette packs that you can purchase in each country. For that reason, they can be used for research purposes, and they can be published in scientific manuscripts without permission

Figure 1. Study stimuli for each country, by imagery type.

215x279mm (300 x 300 DPI)



Figure 2. Trends of noticing, believability, and discussion of PHWs.

209x296mm (300 x 300 DPI)

**STROBE 2007 (v4) checklist of items to be included in reports of observational studies in epidemiology\***  
**Checklist for cohort, case-control, and cross-sectional studies (combined)**

| Section/Topic             | Item # | Recommendation                                                                                                                                                                                                                                                                                                                                                                                                                                                         | Reported on page # |
|---------------------------|--------|------------------------------------------------------------------------------------------------------------------------------------------------------------------------------------------------------------------------------------------------------------------------------------------------------------------------------------------------------------------------------------------------------------------------------------------------------------------------|--------------------|
| Title and abstract        | 1      | (a) Indicate the study's design with a commonly used term in the title or the abstract                                                                                                                                                                                                                                                                                                                                                                                 | 1, 2               |
|                           |        | (b) Provide in the abstract an informative and balanced summary of what was done and what was found                                                                                                                                                                                                                                                                                                                                                                    | 2                  |
| <b>Introduction</b>       |        |                                                                                                                                                                                                                                                                                                                                                                                                                                                                        |                    |
| Background/rationale      | 2      | Explain the scientific background and rationale for the investigation being reported                                                                                                                                                                                                                                                                                                                                                                                   | 4, 5               |
| Objectives                | 3      | State specific objectives, including any pre-specified hypotheses                                                                                                                                                                                                                                                                                                                                                                                                      | 6                  |
| <b>Methods</b>            |        |                                                                                                                                                                                                                                                                                                                                                                                                                                                                        |                    |
| Study design              | 4      | Present key elements of study design early in the paper                                                                                                                                                                                                                                                                                                                                                                                                                | 6, 7               |
| Setting                   | 5      | Describe the setting, locations, and relevant dates, including periods of recruitment, exposure, follow-up, and data collection                                                                                                                                                                                                                                                                                                                                        | 6                  |
| Participants              | 6      | (a) <i>Cohort study</i> —Give the eligibility criteria, and the sources and methods of selection of participants. Describe methods of follow-up<br><i>Case-control study</i> —Give the eligibility criteria, and the sources and methods of case ascertainment and control selection. Give the rationale for the choice of cases and controls<br><i>Cross-sectional study</i> —Give the eligibility criteria, and the sources and methods of selection of participants | 6                  |
|                           |        | (b) <i>Cohort study</i> —For matched studies, give matching criteria and number of exposed and unexposed<br><i>Case-control study</i> —For matched studies, give matching criteria and the number of controls per case                                                                                                                                                                                                                                                 | 6                  |
| Variables                 | 7      | Clearly define all outcomes, exposures, predictors, potential confounders, and effect modifiers. Give diagnostic criteria, if applicable                                                                                                                                                                                                                                                                                                                               | 7-9                |
| Data sources/ measurement | 8*     | For each variable of interest, give sources of data and details of methods of assessment (measurement). Describe comparability of assessment methods if there is more than one group                                                                                                                                                                                                                                                                                   | 8, 9               |
| Bias                      | 9      | Describe any efforts to address potential sources of bias                                                                                                                                                                                                                                                                                                                                                                                                              | 9, 10              |
| Study size                | 10     | Explain how the study size was arrived at                                                                                                                                                                                                                                                                                                                                                                                                                              | 6                  |
| Quantitative variables    | 11     | Explain how quantitative variables were handled in the analyses. If applicable, describe which groupings were chosen and why                                                                                                                                                                                                                                                                                                                                           | 8-10               |
| Statistical methods       | 12     | (a) Describe all statistical methods, including those used to control for confounding                                                                                                                                                                                                                                                                                                                                                                                  | 9, 10              |
|                           |        | (b) Describe any methods used to examine subgroups and interactions                                                                                                                                                                                                                                                                                                                                                                                                    | 9, 10              |
|                           |        | (c) Explain how missing data were addressed                                                                                                                                                                                                                                                                                                                                                                                                                            | 9, 10              |
|                           |        | (d) <i>Cohort study</i> —If applicable, explain how loss to follow-up was addressed<br><i>Case-control study</i> —If applicable, explain how matching of cases and controls was addressed                                                                                                                                                                                                                                                                              | 6                  |

|                          |     |                                                                                                                                                                                                              |        |
|--------------------------|-----|--------------------------------------------------------------------------------------------------------------------------------------------------------------------------------------------------------------|--------|
|                          |     | <i>Cross-sectional study</i> —If applicable, describe analytical methods taking account of sampling strategy                                                                                                 |        |
|                          |     | (e) Describe any sensitivity analyses                                                                                                                                                                        | 10     |
| <b>Results</b>           |     |                                                                                                                                                                                                              |        |
| Participants             | 13* | (a) Report numbers of individuals at each stage of study—eg numbers potentially eligible, examined for eligibility, confirmed eligible, included in the study, completing follow-up, and analysed            | 10, 22 |
|                          |     | (b) Give reasons for non-participation at each stage                                                                                                                                                         | -      |
|                          |     | (c) Consider use of a flow diagram                                                                                                                                                                           | -      |
| Descriptive data         | 14* | (a) Give characteristics of study participants (eg demographic, clinical, social) and information on exposures and potential confounders                                                                     | 10     |
|                          |     | (b) Indicate number of participants with missing data for each variable of interest                                                                                                                          | 22     |
|                          |     | (c) <i>Cohort study</i> —Summarise follow-up time (eg, average and total amount)                                                                                                                             | 6      |
| Outcome data             | 15* | <i>Cohort study</i> —Report numbers of outcome events or summary measures over time                                                                                                                          | 10-12  |
|                          |     | <i>Case-control study</i> —Report numbers in each exposure category, or summary measures of exposure                                                                                                         | -      |
|                          |     | <i>Cross-sectional study</i> —Report numbers of outcome events or summary measures                                                                                                                           | -      |
| Main results             | 16  | (a) Give unadjusted estimates and, if applicable, confounder-adjusted estimates and their precision (eg, 95% confidence interval). Make clear which confounders were adjusted for and why they were included | 10-12  |
|                          |     | (b) Report category boundaries when continuous variables were categorized                                                                                                                                    | 7, 10  |
|                          |     | (c) If relevant, consider translating estimates of relative risk into absolute risk for a meaningful time period                                                                                             | -      |
| Other analyses           | 17  | Report other analyses done—eg analyses of subgroups and interactions, and sensitivity analyses                                                                                                               | 9-12   |
| <b>Discussion</b>        |     |                                                                                                                                                                                                              |        |
| Key results              | 18  | Summarise key results with reference to study objectives                                                                                                                                                     | 13     |
| Limitations              | 19  | Discuss limitations of the study, taking into account sources of potential bias or imprecision. Discuss both direction and magnitude of any potential bias                                                   | 16     |
| Interpretation           | 20  | Give a cautious overall interpretation of results considering objectives, limitations, multiplicity of analyses, results from similar studies, and other relevant evidence                                   | 13-15  |
| Generalisability         | 21  | Discuss the generalisability (external validity) of the study results                                                                                                                                        | 16-17  |
| <b>Other information</b> |     |                                                                                                                                                                                                              |        |
| Funding                  | 22  | Give the source of funding and the role of the funders for the present study and, if applicable, for the original study on which the present article is based                                                | 18     |

\*Give information separately for cases and controls in case-control studies and, if applicable, for exposed and unexposed groups in cohort and cross-sectional studies.

**Note:** An Explanation and Elaboration article discusses each checklist item and gives methodological background and published examples of transparent reporting. The STROBE checklist is best used in conjunction with this article (freely available on the Web sites of PLoS Medicine at <http://www.plosmedicine.org/>, Annals of Internal Medicine at <http://www.annals.org/>, and Epidemiology at <http://www.epidem.com/>). Information on the STROBE Initiative is available at [www.strobe-statement.org](http://www.strobe-statement.org).

## Appendix 2. Percentage or Mean (SE) level for each outcome by survey wave and by imagery type

| Outcomes,<br>Survey waves          | CANADA      |              |             |             | AUSTRALIA   |              |             | MEXICO      |              |             |
|------------------------------------|-------------|--------------|-------------|-------------|-------------|--------------|-------------|-------------|--------------|-------------|
|                                    | Wave        | Imagery Type |             |             | Wave        | Imagery Type |             | Wave        | Imagery Type |             |
|                                    |             | Graphic      | Suffering   | Symbolic    |             | Graphic      | Suffering   |             | Graphic      | Suffering   |
| <b>Noticing PHWs, %</b>            |             |              |             |             |             |              |             |             |              |             |
| Sep 2012                           | 55.82       | 59.40        | 66.57       | 56.30       | n/a         | n/a          | n/a         | 72.07       | 71.73        | 73.07       |
| Jan 2013                           | 62.12       | 64.25        | 72.99       | 63.40       | 82.16       | 81.78        | 82.91       | 74.39       | 73.37        | 76.07       |
| May 2013                           | 64.14       | 66.76        | 74.15       | 64.86       | 80.67       | 80.82        | 80.36       | 76.97       | 76.81        | 77.24       |
| Sep 2013                           | 62.74       | 64.85        | 71.51       | 63.79       | 79.23       | 79.32        | 79.07       | 81.11       | 79.95        | 83.03       |
| <b>Negative Affects, Mean (SE)</b> |             |              |             |             |             |              |             |             |              |             |
| Sep 2012                           | 5.37 (0.03) | 5.74 (0.04)  | 5.25 (0.04) | 4.35 (0.06) | n/a         | n/a          | n/a         | 6.09 (0.03) | 6.19 (0.03)  | 5.82 (0.05) |
| Jan 2013                           | 5.36 (0.03) | 5.73 (0.05)  | 5.21 (0.05) | 4.39 (0.06) | 4.99 (0.03) | 5.04 (0.04)  | 4.89 (0.06) | 6.06 (0.03) | 6.19 (0.03)  | 5.86 (0.04) |
| May 2013                           | 5.32 (0.03) | 5.68 (0.05)  | 5.17 (0.05) | 4.36 (0.06) | 4.93 (0.03) | 5.01 (0.04)  | 4.76 (0.06) | 5.96 (0.03) | 6.07 (0.03)  | 5.77 (0.04) |
| Sep 2013                           | 5.27 (0.03) | 5.61 (0.05)  | 5.16 (0.04) | 4.36 (0.06) | 4.98 (0.03) | 5.07 (0.04)  | 4.81 (0.06) | 5.91 (0.03) | 6.03 (0.03)  | 5.71 (0.04) |
| <b>Believability, Mean (SE)</b>    |             |              |             |             |             |              |             |             |              |             |
| Sep 2012                           | 6.07 (0.03) | 5.99 (0.05)  | 6.42 (0.04) | 5.77 (0.06) | n/a         | n/a          | n/a         | 6.80 (0.03) | 6.75 (0.03)  | 6.97 (0.05) |
| Jan 2013                           | 6.01 (0.03) | 5.93 (0.05)  | 6.34 (0.04) | 5.70 (0.06) | 5.35 (0.03) | 5.28 (0.04)  | 5.50 (0.06) | 6.74 (0.03) | 6.64 (0.03)  | 6.90 (0.04) |
| May 2013                           | 5.98 (0.03) | 5.89 (0.05)  | 6.28 (0.04) | 5.74 (0.06) | 5.39 (0.03) | 5.35 (0.04)  | 5.47 (0.06) | 6.68 (0.02) | 6.58 (0.03)  | 6.86 (0.04) |
| Sep 2013                           | 5.97 (0.03) | 5.94 (0.05)  | 6.22 (0.04) | 5.73 (0.06) | 5.36 (0.04) | 5.35 (0.04)  | 5.40 (0.06) | 6.63 (0.02) | 6.54 (0.03)  | 6.78 (0.04) |
| <b>Quit Motivation, Mean (SE)</b>  |             |              |             |             |             |              |             |             |              |             |
| Sep 2012                           | 5.07 (0.03) | 5.21 (0.05)  | 5.27 (0.05) | 4.22 (0.06) | n/a         | n/a          | n/a         | 6.07 (0.03) | 6.07 (0.03)  | 6.09 (0.06) |
| Jan 2013                           | 5.05 (0.03) | 5.22 (0.05)  | 5.19 (0.05) | 4.30 (0.06) | 4.46 (0.04) | 4.51 (0.05)  | 4.37 (0.07) | 6.16 (0.03) | 6.13 (0.04)  | 6.22 (0.05) |
| May 2013                           | 5.04 (0.03) | 5.20 (0.05)  | 5.17 (0.05) | 4.29 (0.06) | 4.47 (0.04) | 4.55 (0.04)  | 4.32 (0.07) | 6.03 (0.03) | 6.01 (0.04)  | 6.08 (0.05) |
| Sep 2013                           | 4.99 (0.03) | 5.13 (0.05)  | 5.16 (0.05) | 4.22 (0.06) | 4.58 (0.04) | 4.63 (0.05)  | 4.46 (0.07) | 5.97 (0.03) | 5.94 (0.04)  | 6.01 (0.05) |

| Outcomes,<br>Survey waves    | CANADA |              |           |          | AUSTRALIA |              |           | MEXICO |              |           |
|------------------------------|--------|--------------|-----------|----------|-----------|--------------|-----------|--------|--------------|-----------|
|                              | Wave   | Imagery Type |           |          | Wave      | Imagery Type |           | Wave   | Imagery Type |           |
|                              |        | Graphic      | Suffering | Symbolic |           | Graphic      | Suffering |        | Graphic      | Suffering |
| <b>Discussion of PHWs, %</b> |        |              |           |          |           |              |           |        |              |           |
| Sep 2012                     | 14.75  | 17.86        | 13.07     | 12.18    | n/a       | n/a          | n/a       | 31.65  | 31.00        | 33.56     |
| Jan 2013                     | 10.50  | 12.89        | 9.32      | 8.14     | 18.31     | 14.90        | 24.98     | 32.32  | 31.52        | 33.61     |
| May 2013                     | 9.96   | 11.37        | 9.50      | 8.06     | 13.14     | 10.85        | 17.73     | 30.56  | 30.16        | 31.22     |
| Sep 2013                     | 10.32  | 10.49        | 10.00     | 9.24     | 13.91     | 12.47        | 16.81     | 31.66  | 31.36        | 32.14     |
