# Supplementary material for: Which type of tobacco product warning imagery is more effective and sustainable over time? A longitudinal assessment of smokers in Canada, Australia and Mexico
Source: PubMed Central journal article supplement — BMJ Open. 2018 Jul 13;8(7):e021983. doi: 10.1136/bmjopen-2018-021983 (PMC6089327; doi:10.1136/bmjopen-2018-021983), 2018-07-13
Supplement: bmjopen-2018-021983supp002.pdf [file bmjopen-2018-021983supp002.pdf]

**Appendix 2. Percentage or Mean (SE) level for each outcome by survey wave and by imagery type**

| Outcomes,<br>Survey waves          | CANADA      |              |             |             | AUSTRALIA   |              |             | MEXICO      |              |             |
|------------------------------------|-------------|--------------|-------------|-------------|-------------|--------------|-------------|-------------|--------------|-------------|
|                                    | Wave        | Imagery Type |             |             | Wave        | Imagery Type |             | Wave        | Imagery Type |             |
|                                    |             | Graphic      | Suffering   | Symbolic    |             | Graphic      | Suffering   |             | Graphic      | Suffering   |
| <b>Noticing PHWs, %</b>            |             |              |             |             |             |              |             |             |              |             |
| Sep 2012                           | 55.82       | 59.40        | 66.57       | 56.30       | n/a         | n/a          | n/a         | 72.07       | 71.73        | 73.07       |
| Jan 2013                           | 62.12       | 64.25        | 72.99       | 63.40       | 82.16       | 81.78        | 82.91       | 74.39       | 73.37        | 76.07       |
| May 2013                           | 64.14       | 66.76        | 74.15       | 64.86       | 80.67       | 80.82        | 80.36       | 76.97       | 76.81        | 77.24       |
| Sep 2013                           | 62.74       | 64.85        | 71.51       | 63.79       | 79.23       | 79.32        | 79.07       | 81.11       | 79.95        | 83.03       |
| <b>Negative Affects, Mean (SE)</b> |             |              |             |             |             |              |             |             |              |             |
| Sep 2012                           | 5.37 (0.03) | 5.74 (0.04)  | 5.25 (0.04) | 4.35 (0.06) | n/a         | n/a          | n/a         | 6.09 (0.03) | 6.19 (0.03)  | 5.82 (0.05) |
| Jan 2013                           | 5.36 (0.03) | 5.73 (0.05)  | 5.21 (0.05) | 4.39 (0.06) | 4.99 (0.03) | 5.04 (0.04)  | 4.89 (0.06) | 6.06 (0.03) | 6.19 (0.03)  | 5.86 (0.04) |
| May 2013                           | 5.32 (0.03) | 5.68 (0.05)  | 5.17 (0.05) | 4.36 (0.06) | 4.93 (0.03) | 5.01 (0.04)  | 4.76 (0.06) | 5.96 (0.03) | 6.07 (0.03)  | 5.77 (0.04) |
| Sep 2013                           | 5.27 (0.03) | 5.61 (0.05)  | 5.16 (0.04) | 4.36 (0.06) | 4.98 (0.03) | 5.07 (0.04)  | 4.81 (0.06) | 5.91 (0.03) | 6.03 (0.03)  | 5.71 (0.04) |
| <b>Believability, Mean (SE)</b>    |             |              |             |             |             |              |             |             |              |             |
| Sep 2012                           | 6.07 (0.03) | 5.99 (0.05)  | 6.42 (0.04) | 5.77 (0.06) | n/a         | n/a          | n/a         | 6.80 (0.03) | 6.75 (0.03)  | 6.97 (0.05) |
| Jan 2013                           | 6.01 (0.03) | 5.93 (0.05)  | 6.34 (0.04) | 5.70 (0.06) | 5.35 (0.03) | 5.28 (0.04)  | 5.50 (0.06) | 6.74 (0.03) | 6.64 (0.03)  | 6.90 (0.04) |
| May 2013                           | 5.98 (0.03) | 5.89 (0.05)  | 6.28 (0.04) | 5.74 (0.06) | 5.39 (0.03) | 5.35 (0.04)  | 5.47 (0.06) | 6.68 (0.02) | 6.58 (0.03)  | 6.86 (0.04) |
| Sep 2013                           | 5.97 (0.03) | 5.94 (0.05)  | 6.22 (0.04) | 5.73 (0.06) | 5.36 (0.04) | 5.35 (0.04)  | 5.40 (0.06) | 6.63 (0.02) | 6.54 (0.03)  | 6.78 (0.04) |
| <b>Quit Motivation, Mean (SE)</b>  |             |              |             |             |             |              |             |             |              |             |
| Sep 2012                           | 5.07 (0.03) | 5.21 (0.05)  | 5.27 (0.05) | 4.22 (0.06) | n/a         | n/a          | n/a         | 6.07 (0.03) | 6.07 (0.03)  | 6.09 (0.06) |
| Jan 2013                           | 5.05 (0.03) | 5.22 (0.05)  | 5.19 (0.05) | 4.30 (0.06) | 4.46 (0.04) | 4.51 (0.05)  | 4.37 (0.07) | 6.16 (0.03) | 6.13 (0.04)  | 6.22 (0.05) |
| May 2013                           | 5.04 (0.03) | 5.20 (0.05)  | 5.17 (0.05) | 4.29 (0.06) | 4.47 (0.04) | 4.55 (0.04)  | 4.32 (0.07) | 6.03 (0.03) | 6.01 (0.04)  | 6.08 (0.05) |
| Sep 2013                           | 4.99 (0.03) | 5.13 (0.05)  | 5.16 (0.05) | 4.22 (0.06) | 4.58 (0.04) | 4.63 (0.05)  | 4.46 (0.07) | 5.97 (0.03) | 5.94 (0.04)  | 6.01 (0.05) |

| <b>Outcomes,<br/>Survey waves</b> | <b>CANADA</b> |                     |                  |                 | <b>AUSTRALIA</b> |                     |                  | <b>MEXICO</b> |                     |                  |
|-----------------------------------|---------------|---------------------|------------------|-----------------|------------------|---------------------|------------------|---------------|---------------------|------------------|
|                                   | <i>Wave</i>   | <i>Imagery Type</i> |                  |                 | <i>Wave</i>      | <i>Imagery Type</i> |                  | <i>Wave</i>   | <i>Imagery Type</i> |                  |
|                                   |               | <i>Graphic</i>      | <i>Suffering</i> | <i>Symbolic</i> |                  | <i>Graphic</i>      | <i>Suffering</i> |               | <i>Graphic</i>      | <i>Suffering</i> |
| <b>Discussion of PHWs, %</b>      |               |                     |                  |                 |                  |                     |                  |               |                     |                  |
| Sep 2012                          | 14.75         | 17.86               | 13.07            | 12.18           | n/a              | n/a                 | n/a              | 31.65         | 31.00               | 33.56            |
| Jan 2013                          | 10.50         | 12.89               | 9.32             | 8.14            | 18.31            | 14.90               | 24.98            | 32.32         | 31.52               | 33.61            |
| May 2013                          | 9.96          | 11.37               | 9.50             | 8.06            | 13.14            | 10.85               | 17.73            | 30.56         | 30.16               | 31.22            |
| Sep 2013                          | 10.32         | 10.49               | 10.00            | 9.24            | 13.91            | 12.47               | 16.81            | 31.66         | 31.36               | 32.14            |
